## 1        **Development of nanobodies as theranostic agents against CMY-2-like class C $\beta$ -** 2        **lactamases**

3  
4 Cawez Frédéric<sup>a</sup>, Paola Sandra Mercuri<sup>a</sup>, Francisco Morales Yanez<sup>b</sup>, Rita Maalouf<sup>b</sup>, Marylène  
5 Vandevenne<sup>c</sup>, Frederic Kerff<sup>dd</sup>, Virginie Guérin<sup>e</sup>, Jacques Mainil<sup>e</sup>, Damien Thiry<sup>e</sup>, Marc  
6 Saulmont<sup>f</sup>, Alain Vanderplasschen<sup>g</sup>, Pierre Lafaye<sup>h</sup>, Gabriel Aymé<sup>h</sup>, Pierre Bogaerts<sup>i</sup>, Mireille  
7 Dumoulin<sup>b</sup> and Moreno Galleni<sup>a\*</sup>  
8

9 <sup>a</sup>InBioS, Center for Protein Engineering, Biological Macromolecules, Department of Life  
10 Sciences, University of Liège, Belgium; <sup>b</sup>InBioS, Center for Protein Engineering, NEPTUNS  
11 (Nanobodies to Explore Protein Structure and Functions), Department of Life Sciences,  
12 University of Liège, Belgium; <sup>c</sup>InBios, Center for Protein Engineering, ROBOTEIN<sup>®</sup>,  
13 Department of Life Sciences, University of Liège, Belgium; <sup>d</sup> InBioS, Center for Protein  
14 Engineering, Department of Life Sciences, University of Liège, Belgium; <sup>e</sup>Bacteriology,  
15 FARAH and Faculty of Veterinary Medicine, Department of Infectious and Parasitic Diseases,  
16 University of Liège, Belgium; <sup>f</sup>Regional Animal Health and Identification Association  
17 (ARSIA), Ciney, Belgium; <sup>g</sup>Immunology-Vaccinology, FARAH and Faculty of Veterinary  
18 Medicine, Department of Infectious and Parasitic Diseases, University of Liège, Belgium;  
19 <sup>h</sup>Plateforme d'Ingénierie des Anticorps, C2RT, Institut Pasteur, CNRS UMR 3528, Paris,  
20 France; <sup>i</sup>National reference center for antibiotic-resistant Gram-negative bacilli, Department of  
21 Clinical Microbiology, CHU UCL Namur, Yvoir, Namur, Belgium  
22

23 Running head: New inhibitors and detection of the  $\beta$ -lactamase CMY-2  
24

25 \* Address correspondence to Moreno Galleni, [mgalleni@uliege.be](mailto:mgalleni@uliege.be)  
26

27 Word count for the abstract: 162 + 124

28 Word count for the text: 4604  
29  
30  
31  
32  
33  
34

35 **ABSTRACT**

36

37 Soluble single-domain fragments derived from the unique variable region of camelid heavy-  
38 chain antibodies (VHHs) against enzymes may behave as potent inhibitors. The immunization  
39 of alpacas with the CMY-2  $\beta$ -lactamase led to the isolation of three VHHs that specifically  
40 recognized and inhibited CMY-2. The structure of the complex VHH cAb<sub>CMY-2(254)</sub>/CMY-2  
41 was determined by X-ray crystallography. We showed that the epitope is close to the active site  
42 and that the CDR3 of the VHH protrudes in the catalytic site. The  $\beta$ -lactamase inhibition was  
43 found to follow a mixed profile with a predominant non-competitive component. The three  
44 isolated VHHs recognized overlapping epitopes since they behaved as competitive binder. Our  
45 study identified a binding site that can be targeted by a new class of  $\beta$ -lactamase's inhibitors  
46 designed with the help of a peptidomimetic approach. Furthermore, the use of mono or bivalent  
47 VHH and rabbit polyclonal anti-CMY-2 antibodies enable the development of the first  
48 generation of ELISA test for the detection of CMY-2 produced by resistant bacteria.

49

50 **IMPORTANCE**

51

52 The still increasing antimicrobial resistance in human clinic or veterinary medicine is a major  
53 threat for modern chemotherapy. Beside the major caution in the use of current antibiotics, it is  
54 important to develop new classes of antibiotics. This work was focused on  $\beta$ -lactamases that  
55 are the enzymes involved in the hydrolysis of the major class of antibiotics, the  $\beta$ -lactam  
56 compounds. We selected camelid antibodies that inhibit CMY-2, a class C  $\beta$ -lactamase  
57 produced by bacteria isolated from the veterinary and human settings. We characterized the  
58 conformational epitope present in CMY-2 in order to create a new family of inhibitors based  
59 on the paratope of the antibody. Finally, we designed a primary version of a detection system  
60 based on an ELISA using VHH and polyclonal antibodies.

61

62

63

64

65

66

67

## 68 **Introduction**

69

70 Bacterial resistance to antibiotics is unanimously recognized as a major threat in human  
71 and veterinary medicine. Nowadays, the antimicrobial resistance counts for 700000 deaths per  
72 year in the world, including with 30000 deaths in Europe. This figure could exceed ten million  
73 deaths in 2050 if no new treatments and rapid diagnostic assays are developed (1). Among the  
74 different classes of antimicrobials, the  $\beta$ -lactam antibiotics are extensively used because of their  
75 wide spectrum of action and their low toxicity for the eukaryote cells (2). They are able to  
76 specifically neutralize the enzymatic activity of Penicillin Binding Protein (PBP) involved in  
77 the formation of the bacterial cell wall (3,4). Bacteria developed different mechanisms in order  
78 to suppress the biological activity of the antibiotics (5-9), the most common one in Gram-  
79 negative bacteria being the hydrolysis of the  $\beta$ -lactam ring by the expression of enzymes called  
80  $\beta$ -lactamases.

81 Up to date, more than 2800 bla genes are known (10). Their related enzymes are  
82 categorized into 4 molecular classes A, B, C and D based exclusively on their primary sequence  
83 (11). Another classification of the  $\beta$ -lactamases in different functional sub-groups is based on  
84 both molecular and functional characteristics (12).

85 The misuse and the intensive use of antibiotics lead to the selection of multidrug-  
86 resistant (MDR) bacteria which is unaffected by the presence antibiotics belonging to at least  
87 three different classes (13). Therefore, it is essential to develop new diagnostic assays in order  
88 to faster detect the presence of  $\beta$ -lactamase(s) that favor(s) the rapid implementation of  
89 infection control measures and circumvent the nosocomial infections. In addition, it is essential  
90 to develop new inhibitors able to block the  $\beta$ -lactamase activity by targeting binding sites that  
91 are not tolerant to mutations.

92 To develop new inhibitors, one strategy consists to select inhibitory antibodies that serve  
93 to the development of new  $\beta$ -lactamase inhibitors by peptidomimetics (14). VHH, also referred  
94 as nanobody, is the single-domain fragment corresponding to the binding domain of camelid  
95 heavy-chain antibodies (HCAbs), constitutes a potential candidate in view to obtain inhibitory  
96 antibodies against the  $\beta$ -lactamases. They are exclusively found in camelids (VHH) or in  
97 cartilaginous fish (V-NAR) (15). Despite their small size (15kDa), they are able to interact with  
98 their antigen with a high affinity and specificity (16). In addition, VHHs present unique  
99 properties including an easy recombinant production in *E. coli*, an easiness to modify the  
100 properties of the nanobody by protein engineering. Moreover, VHHs are able to inhibit activity

101 of some enzymes as previously described for the lysozyme (17) and for the  $\beta$ -lactamases TEM-  
102 1 (18) and VIM-4 (19).

103 The “RUBLA” project which studied the distribution of *bla* genes in bovine *E. coli*  
104 isolates in Wallonia, Belgium highlighted that the *bla*<sub>CMY-2</sub> coding for the cephalosporinase  
105 CMY-2 is characterized by the broadest geographic spread (20). In addition,  
106 *Enterobacteriaceae* strains expressing this  $\beta$ -lactamase were isolated from animal (22) and  
107 human sources (23).

108 Phenotypic assays were developed to detect the production of AmpC by testing the  
109 susceptibility of the strains for ceftazidime, ceftiofur and cefepime. In addition, phenotypic  
110 confirmation tests imply the use of inhibitors such as cloxacillin or boronic acid derivatives  
111 (24). Nevertheless, those methods cannot identify the different sub-classes of AmpC. The  
112 assays must be complemented by molecular approaches such as PCR or micro-array when  
113 available (25). Those methods are expensive, time-consuming and generally used only for  
114 reference laboratories and research settings (26). Furthermore, expression of multiple  $\beta$ -  
115 lactamases (27) or other resistance features such as the decrease of porins expression could  
116 result in more complex susceptibility patterns (28). Altogether, those observations clearly  
117 demonstrate the real necessity to develop new diagnostic approaches for the veterinary and the  
118 clinic in order to detect AmpC easily and with a high specificity.

119 On the other hand, treatments generally employed to treat infections of  
120 *Enterobacteriaceae* expressing AmpC consist in the use of carbapenems, cefepime or  
121 tazobactam in association with piperacillin (29). Newer  $\beta$ -lactamase inhibitors as avibactam or  
122 vaborbactam have also a high potency against AmpC activity (30). However, it is expected to  
123 favor the apparitions of resistance against those antibiotics and inhibitors, specifically against  
124 carbapenems (31).

125 In this work, we developed nanobodies (VHHs) in order to set-up a sandwich ELISA  
126 for the detection of CMY-2 and to find inhibitors able to neutralize the  $\beta$ -lactamase activity.  
127 We first isolated eight VHHs, belonging to three families, that recognized CMY-2. The results  
128 highlighted a high specificity for their antigen but rapid dissociation rates of the complexes  
129 VHHs/CMY-2. We could stabilize the complex with the development of a homo-bivalent VHH.  
130 Competition assays demonstrated also an overlapping epitope of the VHHs for CMY-2. With  
131 the help of an ELISA test, we could detect the production of CMY-2-like enzymes in a  
132 collection of human and veterinary bacterial isolates. The second goal was to follow the effect  
133 of the VHHs binding on the CMY-2 activity. We found that the VHHs behaved as non-

134 competitive inhibitors of CMY-2 and that the nature of the substrate affected the inhibition  
135 patterns of the nanobodies. The crystallographic structure of the complex formed by CMY-2  
136 and the VHH cAb<sub>CMY-2</sub>(254) allowed to define the epitope recognized by the VHH, the nature  
137 of the paratope and to confirm the inhibitory mechanisms highlighted by the kinetic studies.  
138 Altogether, those results provide new insights for diagnostic and inhibitory antibodies  
139 development against class C  $\beta$ -lactamases.

140

## 141 **Results**

142

143 Construction of an immune VHHs library and selection of CMY-2 targeting binders.  
144 From the blood of an alpaca (*Vicugna pacos*) immunized with CMY-2  $\beta$ -lactamase, an immune  
145 library was constructed. Three rounds of panning using this library were performed to enrich  
146 the library in phage particles exposing CMY-2-specific VHHs using established protocols (47).  
147 Ninety clones of each round of panning, randomly selected, were screened by indirect ELISA  
148 to detect the presence of VHHs specific for CMY-2. Eight clones gave a positive signal in the  
149 ELISA and their gene was sequenced. The results of the sequencing indicated 3 genetically  
150 different VHHs (cAb<sub>CMY-2</sub>(250), cAb<sub>CMY-2</sub>(254) and cAb<sub>CMY-2</sub>(272)) based on the sequence of  
151 the Complementarity Determining Regions (CDRs) (Fig. 1). CDR2 and CDR3 of the VHHs  
152 cAb<sub>CMY-2</sub>(250) and cAb<sub>CMY-2</sub>(272) present a deletion of one and four amino acids, respectively,  
153 compared to the VHH cAb<sub>CMY-2</sub>(254). The FR4 sequences are identical for the three VHH but  
154 we observed a deletion of two amino acids in the FR3 of the VHH cAb<sub>CMY-2</sub>(272). Finally,  
155 despite if the main mutations are identified into the CDRs, the VHH cAb<sub>CMY-2</sub>(254) is also  
156 characterized by additional mutations in the frameworks regions. Based on these results, VHHs  
157 cAb<sub>CMY-2</sub>(250), cAb<sub>CMY-2</sub>(254) and cAb<sub>CMY-2</sub>(272) were produced and purified to complete  
158 their analysis.

159 Binding characterization of the VHHs cAb<sub>CMY-2</sub>(250), cAb<sub>CMY-2</sub>(254) and cAb<sub>CMY-2</sub>(272)  
160 by bio-layer interferometry (BLI). In order to determine the specificity of the VHHs  
161 cAb<sub>CMY-2</sub>(250), cAb<sub>CMY-2</sub>(254) and cAb<sub>CMY-2</sub>(272), qualitative binding measurements were  
162 performed to assess their ability to interact with different representatives of all the molecular  
163 classes of  $\beta$ -lactamases (BLAs). The three VHHs did not recognize  $\beta$ -lactamases from classes  
164 A, B and D (Fig. 2A-C). Remarkably, the VHHs cAb<sub>CMY-2</sub>(254) and cAb<sub>CMY-2</sub>(272) interacted  
165 only with CMY-2-like enzymes (Fig. 2B & 2C) but not with others class C  $\beta$ -lactamases  
166 indicating their remarkable specificity. On the contrary, cAb<sub>CMY-2</sub>(250) displayed a cross

167 reaction with the AmpC P99 of *Enterobacter cloacae* (Fig. 2A). Quantitative binding  
168 measurements were performed in order to measure the kinetic ( $k_{on}$ ,  $k_{off}$ ) and equilibrium ( $K_D$ )  
169 constants (Fig. 2D-F). The association kinetic constants ( $k_{on}$ ) of the three VHHs against CMY-  
170 2 ranged from  $10^5$  to  $10^6$   $M^{-1}s^{-1}$  highlighting a rapid association of the VHHs to their target  
171 (TABLE 1). Nevertheless, all complexes were quite unstable given their relatively fast  
172 dissociation kinetic ( $k_{off} > 5 \cdot 10^{-3} s^{-1}$ ) that leads to overall moderate affinities of VHHs for CMY-  
173 2 ( $K_D > 60$  nM). The comparison of binding properties of the three VHHs showed that cAb<sub>CMY-2</sub>  
174 2(254) presents a dissociation that is up to 20 times lower than the two others VHHs (Fig. 2B)  
175 indicating this VHH is able to form a more stable complex than cAb<sub>CMY-2</sub> (250) and cAb<sub>CMY-2</sub>  
176 (272).

177 Competition binding assay of VHHs directed against CMY-2. We determined if the  
178 three nanobodies could recognize the same or different epitopes. Therefore, we carried out  
179 competition binding assays by BLI based on a premix method. This latter consists in (i) binding  
180 a biotinylated VHH on a streptavidin bio-sensor (SA sensor) and (ii) measuring its association  
181 rate in presence of increasing molar ratios of soluble complexes formed by a second VHH and  
182 CMY-2. The three possible combinations of complexes (cAb<sub>CMY-2</sub>(250)/CMY-2, cAb<sub>CMY-2</sub>  
183 2(254)/CMY-2 and cAb<sub>CMY-2</sub>(272)/CMY-2) were assessed for each biotinylated VHH. A  
184 decrease in the binding rate of the VHH cAb<sub>CMY-2</sub> (254) for increased molar ratios of all  
185 VHH/CMY-2 complexes was observed (Fig. 3), indicating that the VHH cAb<sub>CMY-2</sub>(254)  
186 epitope is, at least, partially overlapping with the epitopes of the two others VHHs. Those  
187 results were confirmed when either VHHs cAb<sub>CMY-2</sub>(250) and cAb<sub>CMY-2</sub>(272) were  
188 immobilized on the bio-sensor confirming the overlap of the epitopes of the three VHHs (Fig.  
189 1S).

190 Binding properties of rabbit polyclonal antibodies directed against CMY-2 (pAbs). The  
191 epitope overlapping of the three VHHs does not allow the development of a VHH sandwich  
192 ELISA. To circumvent this issue, we produced and characterized rabbit polyclonal antibodies  
193 directed against CMY-2 (anti-CMY-2 pAbs) with the purpose to be used in pair with cAb<sub>CMY-2</sub>  
194 2(254), the VHH forming the more stable complex with CMY-2. Firstly, the specificity of anti-  
195 CMY-2 pAbs was analyzed by indirect ELISA where a panel of  $\beta$ -lactamases representative of  
196 all classes representing were coated on a 96-well plate (Fig. 4A). The data clearly indicated that  
197 pAbs directed against CMY-2 were unspecific since they recognized different members of class  
198 C  $\beta$ -lactamases such as CMY-1 and P99. A second assay via BLI was also conducted to further  
199 investigate the specificity of pAbs. Biotinylated  $\beta$ -lactamases were immobilized on streptavidin



200 bio-sensors and then, sensors were immersed into a pAbs solution (Fig. 4B). This experiment  
201 confirms the lack of specificity since bindings were also measured for P99 and CMY-2.  
202 However, no interaction was detected for CMY-1 demonstrating the lack of specificity can  
203 depend on the assay setting and/or the type of immobilization. Finally, the dissociation constant  
204 ( $k_{\text{off}}$ ) was evaluated for pAbs by BLI (Fig. 4C) which, as commonly observed for polyvalent  
205 antibodies, presented a high avidity characterized by a slow dissociation phase ( $k_{\text{off}} = 3.6 \pm 0.9$   
206  $10^{-5} \text{ s}^{-1}$ ) (32).

207 Sandwich ELISA for the detection of the  $\beta$ -lactamase CMY-2. The first step consisted  
208 to evaluate the limits of detection (LOD) for a sandwich ELISA by using  $\text{cAb}_{\text{CMY-2}(254)}$  as  
209 capture antibody and pAbs for the detection (full blue line) or, inversely, the pAbs as capture  
210 antibody and the VHH for the detection (Fig. 5A). The LOD values were calculated from an  
211 average  $\text{Abs}^{450}$  of the CTRL (-) plus three times the standard deviation and corresponded to  
212 13.3 and 3.9 ng/mL using the VHH  $\text{cAb}_{\text{CMY-2}(254)}$  as capture and detection antibodies,  
213 respectively. Compared to LOD values reported in the literature (LOD = 0.86 ng/mL) (33), our  
214 ELISA is characterized by high LOD values that are mainly due to the fast dissociation of  
215 VHH/CMY-2 complexes. This phenomenon has a negative impact on the limit of detection of  
216 our antigens. Moreover, the use of pAbs as capture antibody and VHH for the revelation did  
217 not bring any gain since the responses (measured as  $\text{Abs}^{450}$ ) were lower compared to the initial  
218 settings. On the other hand, the specificity of the sandwich ELISA assay was checked on  
219 purified enzymes (Fig. 5B). Both assays clearly allow the specific detection of CMY-2 since  
220 no signal was measured for others families of  $\beta$ -lactamases.

221 Production and characterization of the bivalent VHH  $\text{cAb}_{\text{CMY-2}(254)}_{\text{BIV}}$ . In order to  
222 increase the sensitivity of the ELISA assay, we designed a bivalent VHH based on the VHH  
223  $\text{cAb}_{\text{CMY-2}(254)}$ . This genetically engineered bivalent antibody ( $\text{cAb}_{\text{CMY-2}(254)}_{\text{BIV}}$ ) consists in  
224 the fusion of two VHHs  $\text{cAb}_{\text{CMY-2}(254)}$  in tandem repeats, joined by a peptide linker  $(\text{GGGS})_3$   
225 (34). The  $\text{cAb}_{\text{CMY-2}(254)}_{\text{BIV}}$  was produced and purified in comparable amount than the  
226 monovalent VHH. In addition, no degradation of the tandem was observed. Bivalent VHHs  
227 may exhibit an increased apparent affinity (or avidity) due to a significant decrease in the  
228 dissociation rate constant (decreased  $k_{\text{off}}$  value) from the immobilized antigen (35). As  
229 expected, the dissociation rate significantly decreased for the VHH  $\text{cAb}_{\text{CMY-2}(254)}_{\text{BIV}}$  ( $k_{\text{off}} = 3.8$   
230  $\pm 0.4 \times 10^{-4} \text{ s}^{-1}$ ) compared to its monovalent counterpart ( $k_{\text{off}} = 6.3 \pm 0.5 \times 10^{-3} \text{ s}^{-1}$ ) (Fig. 6). This  
231 implies a more stable Antigen/Antibody complex.

232 Sandwich ELISA for the detection of CMY-2 using the bivalent VHH cAb<sub>CMY-2</sub>-  
233 <sub>2(254)</sub><sub>BIV</sub>. As for the monovalent counterpart, we evaluated the limits of detection (LOD) for a  
234 sandwich ELISA by using the bivalent VHH cAb<sub>CMY-2(254)</sub><sub>BIV</sub> as capture antibody and pAbs  
235 for the detection (full blue line) and, in parallel, the pAbs as capture antibody and the bivalent  
236 VHH for the detection (dotted blue line) (Fig. 7A). Those sets up provided LOD values around  
237 2.3 and 1.4 ng/mL using the VHH cAb<sub>CMY-2(254)</sub><sub>BIV</sub> as capture and detection antibodies,  
238 respectively. The use of the bivalent VHH clearly improves the detection of CMY-2. Moreover,  
239 those configurations seem to not impede the specificity of the ELISA system (Fig. 7B). Indeed,  
240 higher sensibility of the assay combined with its high specificity can allow the use of the  
241 bivalent VHH cAb<sub>CMY-2(254)</sub><sub>BIV</sub> for the detection of CMY-2 produced in bacterial isolates.

242

243 **Detection of CMY-2  $\beta$ -lactamase in bovine and human bacterial isolates.** According  
244 to the previous results for purified CMY-2, three sandwich ELISAs were designed for the direct  
245 detection of CMY-2 produced in bovine and human bacterial isolates. In these experiments, the  
246 monovalent VHH cAb<sub>CMY-2(254)</sub> was only used as capture antibody and anti-CMY-2 pAbs for  
247 the detection. At the opposite, the bivalent VHH was used as antibody for capture and revelation  
248 since both configurations improved the sensitivity of the assay. Foremost, the three different  
249 ELISA allowed the detection of a large panel of CMY-2 sub-group variants such as CMY-16  
250 and CMY-60 (TABLE 2). In addition, no cross reactions were observed for other class C  $\beta$ -  
251 lactamases such as the CMY-10 (CMY-1-like), DHA, ACT or subclasses of AmpC expressed  
252 in bovine isolates. Interestingly, the bivalent VHH cAb<sub>CMY-2(254)</sub><sub>BIV</sub> used as antibody for the  
253 capture and the revelation ensured a higher sensitivity for the detection of  $\beta$ -lactamases  
254 belonging to the CMY-2 sub-group compared to the monovalent VHH cAb<sub>CMY-2(254)</sub> used as  
255 capture antibody. Effectively, only 17 on 22 bacterial isolates presenting one gene coding for  
256 CMY-2 sub-group variant were detected via the monovalent VHH versus 21 isolates for the  
257 bivalent VHH cAb<sub>CMY-2(254)</sub><sub>BIV</sub> (TABLE 2). Our data suggest that our sandwich ELISA can  
258 be employed to detect specifically  $\beta$ -lactamases from the CMY-2 sub-group with the interest  
259 to use the bivalent VHH cAb<sub>CMY-2(254)</sub><sub>BIV</sub> in order to increase the sensitivity of detection.

260

261 **Effects of the VHHs on the enzymatic activity of CMY-2: kinetic characterization.**  
262 The CMY-2 activity for 4  $\beta$ -lactam substrates was studied in the presence of the VHH cAb<sub>CMY-2</sub>-  
263 <sub>2(254)</sub> (Fig. 8). The 4 substrates were chosen based mainly on nature of the side chain of carbon  
264 C2 for penicillin and the C3 for the three cephalosporins (Fig. S2). This selection aims to



265 potentially provide a link between the nature of the side chains of these antibiotics and the  
266 strength of inhibition. The results highlight that the residual activity of cAb<sub>CMY-2</sub>(254)/CMY-2  
267 complexes, at the higher molar ratio tested, against the three cephalosporins was comprised  
268 between 10 and 15 % compared to the activity of the free enzyme. On the other hand, the  
269 residual activity for the ampicillin hydrolysis plateaued at 40 %, indicating an inhibition of  
270 CMY-2 activity for this substrate less efficient and probably following another mechanism of  
271 inhibition. Finally, a similar inhibitory profile was observed for CMY-2 in complex with VHHs  
272 cAb<sub>CMY-2</sub>(250) and cAb<sub>CMY-2</sub>(272) for the hydrolysis of nitrocefin (Fig. S3). These results are  
273 in full agreement with those of competitive binding assessments (Fig. 4) and support the  
274 hypothesis that the three VHHs bind to an overlapping epitope.

275 Linearization of the substrate hydrolysis curves were carried out from the equation II  
276 (TEXT. S1), in order to derive the steady-state kinetic parameters of CMY-2 alone or in  
277 interaction with VHHs. The  $K_m^{app}$  values of CMY-2 for the nitrocefin was not affected by the  
278 presence of the VHH, while the deacylation constant ( $k_{cat}^{app}$ ) decreased in presence of increasing  
279 concentration of cAb<sub>CMY-2</sub>(254) (Fig. 9A). These observations suggest a non-competitive  
280 inhibition trend where the VHH did not prevent the interaction between the substrate and the  
281 active site of CMY-2. Nevertheless, this VHH could affect the stability of the acyl-enzyme  
282 and/or the deacylation phenomenon. Moreover, the plot illustrating  $1/k_{cat}^{app}$  in function of  
283 inhibitors concentration (Fig. 9B) displayed a linear trend suggesting a pure non-competitive  
284 inhibition. Therefore, the ESI complex was poorly active when the concentration of the VHH  
285 cAb<sub>CMY-2</sub>(254) was significantly higher than the inhibition constant value ( $K_i$ ). Based on this  
286 model, the values of the theoretical parameters  $\alpha$  and  $\beta$  were estimated at 1 and 0, respectively  
287 (Scheme 1, Material and Methods, steady-state kinetics studies). The  $K_i$  of the VHH cAb<sub>CMY-2</sub>  
288 (254) for CMY-2 was determined from the equation IV (TEXT. S1) and is equal to  $88 \pm 3$  nM  
289 which is in good agreement with the equilibrium constant of dissociation of the complex  
290 assessed by BLI (TABLE 1).

291 Residual activities measurements suggested a similar inhibition pattern of CMY-2  
292 activity by the VHH cAb<sub>CMY-2</sub>(254) for the hydrolysis of the three tested cephalosporins (Fig.  
293 8). Thereby, considering  $K_m^{app}$  unchanged for any concentrations in inhibitors, the VHH also  
294 behaved as a pure non-competitive inhibitor (Fig. 10 A & B) with  $K_i$  values of  $48 \pm 10$  nM and  
295  $107 \pm 13$  nM for the cephaloridin and the cefalotin, respectively. On the contrary, for ampicillin  
296 (Fig. 10C), the hyperbole tendency of  $1/k_{cat}^{app}$  as function of VHH concentration was indicative  
297 of a mixed non-competitive inhibition. In this case, the parameter  $\beta$  was equal to  $0.41 \pm 0.01$

298 and the  $K_i$  value equals to  $352 \pm 62$  nM (equation V, TEXT. S1). Our data indicated that, for  
299 ampicillin, the ESI complex presented a reduced but not abolished activity compared to the ES  
300 complex when the concentration of cAb<sub>CMY-2</sub>(254) is significantly higher than the inhibition  
301 constant value ( $K_i$ ).

302

303 **Structural characterization of the cAb<sub>CMY-2</sub>(254)/CMY-2 complex.** The crystal of  
304 the cAb<sub>CMY-2</sub>(254)/CMY-2 complex belonged to the P6<sub>2</sub>22 space group and diffracted at a  
305 resolution of 3.2 Å. All data and refinement statistics are summarized in Table 3. The  
306 asymmetric unit contained one complex CMY-2/VHH. The model includes residues K3 to  
307 Q361 in the  $\beta$ -lactamase molecules and residues Q1 to H124 in the cAb<sub>CMY-2</sub>(254) with the  
308 exception of residues G108 and E109 in the CDR3 which were not defined in the electronic  
309 density.

310 The binding area between the two proteins was about 950 Å<sup>2</sup>. The VHH cAb<sub>CMY-2</sub>(254)  
311 interacted via their CDR1 and CDR3 loops at junction between the  $\alpha$  and the  $\alpha/\beta$  domains of  
312 CMY-2 (Fig. 11 A & B). In more details, a first hydrophobic cluster was formed by residues  
313 V2 (N-terminal end), residues F27 and Y32 from CDR1 and I98 from CDR3 of the VHH  
314 cAb<sub>CMY-2</sub>(254) and residues K290, V291, A294 and L296 located on the helix  $\alpha$ 12 and the  $\beta$ -  
315 strand  $\beta$ 13 of CMY-2 (Fig. 11C).

316 Moreover, the N-terminal residues of the CDR3 (i.e. D99, R100 and L102) established  
317 H-bonds with the main chain of residues L293 and A295 located respectively on the helix  $\alpha$ 12  
318 and the  $\beta$ -strand  $\beta$ 13 and with the residue Q141 found on the  $\alpha$ 5 $\beta$ 5 loop (Fig. 11D). Finally,  
319 the residues D111 and Y112 from the C-terminal end of the CDR3 made H-bonds with CMY-  
320 2 residues S289 and K290, respectively.

321 All these interactions resulted in a partially entry of the CDR3 into CMY-2 active site,  
322 mediated mainly by the residue Y110 of the VHH (Fig. 11D). However, both residues G108  
323 and E109 were not defined in the electron density, highlighting an important flexibility of this  
324 CDR3 region and the VHH inability to enable the entrance of the substrate into the CMY-2  
325 active site.

326

327

328

329

## 330 Discussion

331

332 **Overlapping epitopes of the VHHs.** The immunization of alpacas allowed the  
333 selection of three VHHs. Competition binding assays highlighted that the three VHH bind to  
334 an overlapping epitope on CMY-2. The structure of the complex cAb<sub>CMY-2</sub> (254)/CMY-2  
335 revealed essentially the insertion of the CMY-2 K290 into a pocket on the surface of cAb<sub>CMY-2</sub>  
336 (254) (Fig. 11C) and a second binding area involving most of the CDR3 (Fig. 11D). The  
337 residues forming the pocket are conserved between the three VHHs except for the I98 which is  
338 mutated into an alanine (Fig. 1). Despite the CDR3 constitutes the least conserved region among  
339 the VHHs, it is probable that the three VHHs share a similar binding mode with different  
340 affinities related to the ability of the CDR3 to bind to CMY-2.

341

342 **Biochemical features of the VHHs for the CMY-2 sub-family.** *In vitro* binding assays  
343 demonstrated that cAb<sub>CMY-2</sub> (254) and cAb<sub>CMY-2</sub> (272) present a higher specificity for  $\beta$ -  
344 lactamases belonging to the CMY-2 sub-family (no recognition of CMY-1 and P99) than  
345 cAb<sub>CMY-2</sub> (250) which also binds P99. The both higher affinity and specificity of the VHH  
346 cAb<sub>CMY-2</sub> (254) justified its use for the screening of bovine and human bacterial isolates by a  
347 sandwich ELISA assay. *In vivo* binding assays on bacterial isolates highlighted the ability to  
348 detect different variants from the CMY-2 sub-family as CMY-16, -42, -58, -60 and -61. In fact,  
349 the sequence implied in the interaction with the VHH is conserved for all variants from the  
350 CMY-2 sub-family meaning the high probability to detect also other CMY-2-like  $\beta$ -lactamases.  
351 Moreover, we were not able to detect other class C  $\beta$ -lactamases such as ACT-1, DHA-1 and  
352 CMY-10. ACT-1 and P99 present a high sequence identity with CMY-2 (Fig S4) providing a  
353 similar conformation of the helix  $\alpha$ 12 (Fig. 12A). However, the Ala295 is substituted by a  
354 proline in P99 and ACT-1 what may explain the inability to interact with the VHH. The  
355 presence of a proline introduces a steric hindrance in the helix and may displace the H-bonds  
356 network stabilizing the VHH/CMY-2 complex. The steric hindrance with the glutamate E294  
357 and the total conformation change of the helix  $\alpha$ 12 due to a low sequence identity with CMY-  
358 2 could prevent the interaction of CMY-1 and CMY-10 with the VHH (Fig. 4.12B).

359

360 **Biochemical features of the polyclonal antibodies against CMY-2.** The overlapping  
361 epitope on CMY-2 and shared by the three VHHs required the development of rabbit polyclonal  
362 antibodies. These antibodies were less specific since they were able to recognize P99 and CMY-

363 1. They correspond to a mix of antibodies probably able to bind to epitopes shared by a large  
364 panel of AmpC  $\beta$ -lactamases what could explain their lack of specificity (32). Fortunately, the  
365 use of the VHH cAb<sub>CMY-2</sub> (254) permitted to offset the low specificity of the pAbs for the  
366 detection of CMY-2 in the sandwich ELISA.

367

368 **Development of tandem-repeats VHH cAb<sub>CMY-2</sub> (254)<sub>BIV</sub>.** Another interesting aspect  
369 with the VHHs is the possibility to fuse them in order to decrease the dissociation rate by an  
370 avidity phenomenon leading to more stable complexes Antigen/Antibody (35-37). Associated  
371 with the multi-avidity ensured by the polyclonal antibodies, this allowed to detect lower  
372 quantities of CMY-2 than the monovalent counterpart.

373

374 **Applicability in an ELISA.** This study presented as more interest the use of the VHH  
375 as antibody for the detection of a  $\beta$ -lactamase. On contrary with monoclonal antibodies, they  
376 are easier to produce and purify and present some biochemical features allowing a better  
377 stability and solubility. Moreover, they generally display a high affinity and specificity for its  
378 antigen essential to obtain the more suitable detection assay as already demonstrated for cancer  
379 biomarkers (38, 39). The possible lower affinity of some VHHs can be compensated by the  
380 engineering of in tandem-repeats VHHs improving the sensitivity of a detection assay due to  
381 an avidity phenomenon.

382

383 One goal of the project RU-BLA-ESBL-CPE consisted to develop a sandwich ELISA  
384 “type” for the detection of one of the most spread  $\beta$ -lactamase, CMY-2, in bovines and more  
385 largely in the animal world. However, our next aim is to develop an Immunochromatographic  
386 Lateral Flow Assay that ensures a detection more rapidly and in an easier manner aiming an  
387 interesting alternative for veterinarians to phenotypic methods (40).

388

389 Finally, despite this test is probably suitable for CMY-2 detection in animals, it stays  
390 less applicable in human medicine where phenotypic assays constitute an unavoidable method  
391 for selection of the best antibiotic. However, we could imagine use this kind of set up to  
392 interpret more easily difficult phenotypic profiles generally found in MDR strains (27), to  
393 distinguish plasmid to chromosomal AmpC (41) and to highlight the involvement of an AmpC  
394 in a carbapenemase activity of the strain (28).

395

396           **The VHH cAb<sub>CMY-2</sub> (254), a non-competitive inhibitor of the CMY-2 activity.** This  
397 work allowed also the selection of VHHs which behave as non-competitive inhibitors. The  
398 structure of the complex cAb<sub>CMY-2</sub> (254)/CMY-2 highlighted an important flexibility of the  
399 CDR3 loop located in the active site what does not prevent the entry of the substrate in the  
400 active site. Nevertheless, the Tyr100 brought by the CDR3 is situated near to the Gln120 which  
401 is considered as a crucial residue involved in the stabilization of the acyl-enzyme by the  
402 establishment of H-bonds with the C7 amide carbonyl of the substrate (42). Therefore, despite  
403 the Y110 does not directly bind the Gln120 in CMY-2, this may impede the stabilization of the  
404 acyl-enzyme (Fig. 13). Moreover, the interaction of the VHH around the active site may perturb  
405 the dynamic of the enzyme which is known to be essential for the optimal activity of the enzyme  
406 (43).

407           Our study provided also the evidence that the mechanism of inhibition can be different  
408 in function of the substrate. We found that the VHH behaved as a non-competitive inhibitor  
409 with its ability to completely inhibit the activity of CMY-2 for all cephalosporins tested (scheme  
410 1). However, in presence of ampicillin, the complex maintained a reduced activity  
411 corresponding to a mixed non-competitive inhibition. The more plausible explanation consists  
412 in the fact that the ampicillin can easily diffuse in the active site due to its smaller size resulting  
413 in less impact by an eventual steric hindrance and/or motion perturbations.

414  
415           **Peptidomimetics from VHH, an alternative strategy to classical inhibitors.** Despite  
416 the VHH is smaller than classical antibodies (15 KDa versus 150 KDa), it stays too bulky to  
417 penetrate into the periplasm space of the bacteria. Actually, one strategy in view to minimize  
418 the size of inhibitors consists in the development of small peptides by peptidomimetics. These  
419 present several advantages: (I) an easier production in large scale-up with a cheaper cost, (II)  
420 the low tissues penetration of large molecules and antibodies rendering less efficient the drug  
421 delivery and its action and (III) the humanization of therapeutics antibodies which can be  
422 laborious and which can lead finally to the development of human anti-mouse antibody  
423 (HAMA) (44, 45).

424  
425           One category implied the development of peptides based on the therapeutics  
426 monoclonal antibodies as from the rhuMAb 4D5 (trastuzumab) used in the treatment of the  
427 breast cancer where a gene HER-2 is upregulated and induces the cellular proliferation (46).  
428 More interestingly, VHHs were also used as scaffold for the development of peptides as against  
429 the VEGF (Vascular Endothelial Growth Factor) factor implied in angiogenesis in tumor

430 development (47) or against the receptor  $\beta$ -2 adrenergic associated with chronic inflammation  
431 (48).

432

433 The main drawback to consider in peptidomimetics consists in generally lower affinities  
434 compared to the corresponding antibodies. In fact, we could reach  $K_D$  values near or upper than  
435 1  $\mu$ M. However, some studies demonstrated that lower affinities resulted from a decrease of the  
436 association constant independently of the dissociation rate (49, 50).

437

438 To conclude, peptides remind an important alternative to nanobodies as therapeutic  
439 agents due to their smaller size and their interesting pharmaceutical features against some  
440 domains as cancers or inflammation. We could consider this type of development against the  
441  $\beta$ -lactamases as CMY-2 which stays more interesting for the veterinarians, but also against  
442 more interesting enzymes such as metallo- $\beta$ -lactamases.

443

## 444 **Material and methods**

445

### 446 **Production of the $\beta$ -lactamase CMY-2**

447

448 CMY-2 was produced as previously described by *Cedric Bauvois et al., 2005* (21). The  
449 CMY-2 protein was stored at  $-20^\circ\text{C}$  in 50 mM MOPS buffer at pH 7.0 containing 10 % glycerol  
450 (w/v) and at  $-20^\circ\text{C}$ . Its integrity was verified by Coomassie-stained SDS-PAGE and mass-  
451 spectrometry (ESI-Q-TOF). The concentration of the purified enzyme was determined by its  
452 absorbance at 280 nm ( $\epsilon^{280} = 93850 \text{ M}^{-1} \text{ cm}^{-1}$ ).

453

### 454 **Selection of VHHs by phage display**

455

456 One alpaca (*V. pacos*) was immunized by six weekly sub-cutaneous injections of 100  
457  $\mu$ g of LPS-free CMY-2 mixed with Gerbu adjuvant. The immune library was constructed  
458 following a previously developed protocol from *Conrath et al* (18) while the VHHs selection  
459 by phage display and the screening of the selected VHHs were performed as described in  
460 *Pardon et al* (51). All details concerning those experiments are described in the supplemental  
461 material (TEXT S1).

462



## 463 **Cloning of VHHs genes into pHEN14, scale-up production and purification**

464

465 Genes coding for VHHs selected by phage display were subcloned into the expression  
466 vector pHEN14 between the restriction enzyme sites HindIII in the 5'-extremity and BstEII in  
467 the 3'-extremity. This vector derived from the phagemid pHEN6 where the resistance to  
468 ampicillin is replaced by the resistance to chloramphenicol and where there is no myc tag (19).  
469 Genes coding for the bivalent VHHs, corresponding to two identical VHHs in tandem repeats  
470 joined by a peptide linker (GGGS)<sub>3</sub>, were ordered into the pHEN14 from Genecust (Boynes,  
471 France) (34). Production of monovalent and bivalent VHHs started with the transformation of  
472 competent *E. coli* WK6 with plasmid constructs by thermic shock. Then, the cells were plated  
473 on LB agar containing chloramphenicol (25 µg/mL) for selection. VHHs were produced in  
474 flasks in a Terrific Broth Medium supplemented by the antibiotic (25 µg/mL) and where a  
475 preculture of one colony was added to attempt an initial OD<sup>600</sup> = 0.2. The growth was performed  
476 at 37°C until an OD<sup>600</sup> ≈ 0.8 before addition of 1 mM IPTG to induce the production of the  
477 VHHs overnight at 28°C. The cells were harvested and a periplasmic extraction by osmotic-  
478 shock was carried out with a solution containing 0.5 M sucrose. This extraction was followed  
479 by an affinity chromatography with an HisTrap HP Ni-nitrilotriacetic acid column (Cytiva) and  
480 a purification by size-exclusion chromatography (Superdex75). Purified VHHs were conserved  
481 in a 50 mM PBS pH 6.1. The purity and the integrity of the VHHs were verified by Coomassie-  
482 stained SDS-PAGE and masse spectroscopy (ESI-Q-TOF).

483

## 484 **Immunization of rabbits and purification of polyclonal antibodies (pAbs)**

485

486 Polyclonal antibodies (pAbs) were obtained by rabbit immunization realized by the  
487 CER Group (Marloie, Belgium), that consisted in four injections of 500 µg of CMY-2 all two  
488 weeks in a standard subcutaneous way. Then, sera recovered from blood were conditioned in a  
489 50 mM PBS pH 7.4 buffer and pAbs were purified with a HiTrap Protein A HP antibody  
490 purification column (Cytiva) where the elution buffer corresponded to 20 mM Glycine pH 2.0  
491 buffer. Fractions containing the pAbs were pooled and dialyzed against a 50 mM PBS pH 7.4  
492 buffer overnight at 4°C. The integrity and purity of the pAbs were assessed by Coomassie-  
493 stained SDS-PAGE while concentration of the pAbs was measured by Bicinchoninic Acid  
494 Assay (BCA).

495

## 496 **In-vitro biotinylation of antigen and antibodies**

497

498 Bio-layer interferometry experiments (BLI) and ELISAs tests may require biotinylated  
499 proteins. To this aim, we used the EZ-link<sup>®</sup>NHS-PEG<sub>4</sub> biotin kit (ThermoScientific, United  
500 States) to covalently bind biotin molecules on lysine residues of proteins. The chemical reaction  
501 was performed at room temperature, for 30 minutes and with a [Biotin]:[protein] ratio of 3:1.  
502 The excess of biotin was removed by the elution of the reaction mixture on Sephadex G25  
503 column. The labelled protein was conserved in 50 mM PBS at pH 7.5 at a final concentration  
504 between 100 and 500 µg/mL.

505

## 506 **Kinetic characterization by bio-layer interferometry**

507

508 All bio-layer interferometry (BLI) experiments were performed on the OCTET HTX  
509 instrument (ForteBio, Sartorius) at 30°C using 96-well black polypropylene microplates  
510 (Greiner BioOne, Belgium). All proteins were diluted in a kinetic buffer (50 mM PBS pH 7.4  
511 supplemented with 0.1 % BSA (w/v) and 0.05 % tween-20 (v/v)). All data were analyzed by the  
512 Octet software version 12.0 (Sartorius, France).

513 The specificity of the binding consisted in the immobilization of 2 µg/mL of purified  
514 VHHs on Anti-His coated sensors (His1K, Sartorius) via their His<sub>6</sub> tag. Then, a baseline was  
515 monitored with the kinetic buffer for 60 s. Binding to the VHHs coated on the sensor was  
516 monitored by incubating, for 120 s, the VHH in presence of a solution of 500 nM of antigens  
517 representing all classes of β-lactamases: TEM-1 for class A, VIM-4 for class B, CMY-1, CMY-  
518 2 and P99 for class C and OXA-48 for class D. The dissociation kinetic constant of the complex  
519 was monitored for 300 s by incubating the sensor in the kinetic buffer. Moreover, for the  
520 quantitative binding assays, the conditions for each VHH were as follows: i) cAb<sub>CMY-2</sub> (250)  
521 was assessed on 10 and 60 s of association and dissociation, respectively, using a range of  
522 CMY-2 concentration between 50-250 nM; ii) cAb<sub>CMY-2</sub> (254) on 60 and 600 s and using a  
523 range between 40 and 450 nM; iii) cAb<sub>CMY-2</sub> (272) on 30 and 180 s and using a range between  
524 20 and 110 nM. Kinetics constants ( $k_{on}$  and  $k_{off}$ ) and equilibrium constant ( $K_D$ ) were calculated  
525 using a 1:1 interaction model with a global fit based on at least seven analyte concentrations  
526 indicated on all sensorgrams.

527

528 Avidity studies were achieved using streptavidin bio-sensors (SA sensor, Sartorius)  
529 where biotinylated CMY-2 was immobilized for 30 to 50 minutes at a concentration comprised  
530 between 10 and 50  $\mu\text{g}/\text{mL}$ . A quench reaction was realized by incubating biocytine 10  $\mu\text{M}$  for  
531 300 s. Then, the binding of the monovalent and the bivalent VHHs was monitored for 30 s using  
532 a range of CMY-2 concentration between 150-1000 nM and 75-375 nM, respectively. The  
533 dissociation of the complexes was measured for 600 s in the kinetic buffer. The binding of the  
534 rabbit polyclonal antibodies (pAbs) to the antigen was monitored for 60s (12.5-200 nM of  
535 CMY-2) and the dissociation of the complexes was measured for 600 s. A global fit based on  
536 5 analyte concentrations was realized only for dissociation constant ( $k_{\text{off}}$ ) thanks to an  
537 exponential decay mathematic model. Specificity binding of the pAbs was undertaken  
538 following the same setup except the association that was measured for 300 s using 500 nM of  
539 pAbs.

540

541 Competition binding assays were performed by a premix method with streptavidin bio-  
542 sensor (SA sensor, Sartorius). Firstly, a biotinylated VHH (2  $\mu\text{g}/\text{mL}$ ) was immobilized on the  
543 sensor to reach a variation of the signal ( $\Delta\lambda$ ) of around 1 nm. Complexes VHH/CMY-2 were  
544 obtained by incubating CMY-2 (200 nM) and the VHH (100 nM- 4  $\mu\text{M}$ ) for 15 minutes at 30°C.  
545 Then, the solutions were loaded in order to assess the association between the immobilized  
546 VHH and the complexes VHH/CMY-2. Binding rates were measured for the first 120 s of the  
547 association phase with an exponential mathematics model.

548

#### 549 **pAbs specificity by indirect ELISA**

550

551 The specificity of pAbs directed against CMY-2 (Anti-CMY-2 pAbs) was determined  
552 by an indirect ELISA. To this aim, 500 ng of antigens representing all classes of  $\beta$ -lactamases  
553 and diluted in 50 mM MES pH 5.5 buffer were immobilized by absorption on a 96-well NUNC  
554 maxisorp (ThermoScientific, United States) overnight at 4°C. All non-specific sites were  
555 saturated using 1 % BSA (w/v) for two hours. Then, 500 ng of anti-CMY-2 pAbs were added  
556 in each well. The assay was revealed by a 1/2000 diluted goat anti-rabbit antibody conjugated  
557 to horseradish peroxidase (HRP) (Abcam, UK). All steps were followed by 5 washes with 50  
558 mM pH 7.5 buffer with 0.05 % tween-20. Antibodies were diluted in the washing buffer and  
559 all incubations were performed for 1 hour at 28°C. TMB (3,3',5,5'-Tetramethylbenzidine,  
560 Merck, Germany) substrate was used for system revelation. The reaction was quenched with

561 1M H<sub>3</sub>PO<sub>4</sub> and the plates were read at 450 nm using an Infinite M200 Pro microplate reader  
562 (Tecan, Switzerland).

563

### 564 **Sandwich ELISA assay development for CMY-2 detection**

565

566 A sandwich ELISA for CMY-2 detection was designed to investigate the limit of  
567 detection (LOD) and the specificity of the different assays formats. To this aim, several  
568 combinations of capture and detection VHHs and anti-CMY-2 pAbs were tested. Briefly, 500  
569 ng of biotinylated VHH cAb<sub>CMY-2</sub> (254) (monovalent or bivalent) or 2 µg of biotinylated anti-  
570 CMY-2 pAbs were used as capture agent on a 96-well NUNC streptavidin polysorb plate  
571 incubated overnight at 4°C. The plate was blocked by a 1 % (w/v) BSA solution. Then, the  
572 purified CMY-2 was added in serial dilutions from 10<sup>-4</sup> to 2 µg/mL to determine the LODs of  
573 the four assay combinations. The LODs values were calculated with a sigmoidal model on  
574 graph prism (equation I, TEXT S1).

575 The specificity of the assays was evaluated with 200 ng of the 7 β-lactamases belonging  
576 to the four classes of β-lactamases. At least three wells where antigen was omitted were used  
577 as blank. Additionally, the detection of CMY-2 produced by human and bovine bacterial  
578 isolates was performed as follow. The different strains were grown in TB medium  
579 supplemented by 100 µg/mL ampicillin for 4 hours at 37°C. Strains were lysed by sonication  
580 with a Bioruptor Plus (Diagenode, Belgium) and centrifuged at 18000g in order to recover the  
581 bacterial content. An *E. coli* DH5α strain was used as negative control. All detection assays on  
582 bacterial isolates were realized by using 5 µg of bacterial crude extract. Detection of CMY-2  
583 was performed by adding 500 ng/well of pAbs themselves followed by the addition of a 1/2000  
584 diluted goat anti-rabbit antibody conjugated to HRP (Abcam, UK) or by adding 200 ng/well of  
585 monovalent or bivalent cAb<sub>CMY-2</sub> (254) recognized by 1/2000 diluted rabbit anti-HCAbs  
586 antibody conjugated to HRP (Genscript, United States). TMB was used as substrate while  
587 reaction was stopped by 1 M H<sub>3</sub>PO<sub>4</sub>. Abs<sup>450</sup> was recorded using an Infinite M200 Pro  
588 microplate reader (Tecan, Switzerland). All steps described above were performed for one hour  
589 at 28°C and were followed by 5 washes of 50 mM PBS pH 7.5 buffer where 0.05 % tween-20  
590 was added.

591

### 592 **Steady-state enzymatic kinetics**

593

594 Steady-state enzymatic kinetics were performed at 30°C using a 50 mM PBS pH 7.5  
 595 supplemented with 50 µg/mL BSA. Absorbances were measured with a Specord 75  
 596 spectrophotometer (AnalytikJena, Germany) and a SpectraMx M2 microplate reader  
 597 (Molecular Devices, United States). Initial rates and complete hydrolysis of substrate were  
 598 measured for the hydrolysis of : 100 µM ampicillin ( $\Delta\epsilon^{235} = -820 \text{ M}^{-1} \text{ cm}^{-1}$ ), 100 µM cefalotin  
 599 ( $\Delta\epsilon^{273} = -6300 \text{ M}^{-1} \text{ cm}^{-1}$ ), 100 µM cephaloridin ( $\Delta\epsilon^{260} = -10000 \text{ M}^{-1} \text{ cm}^{-1}$ ) and 40 µM nitrocefin  
 600 ( $\Delta\epsilon^{482} = +15000 \text{ M}^{-1} \text{ cm}^{-1}$ ). The enzyme CMY-2 concentration used to hydrolyze the various  
 601 substrates was comprised between 0.2 nM to 5 nM and was mixed with increasing amounts of  
 602 the VHH cAb<sub>CMY-2</sub> (254) (0-1500 nM). All steady-state kinetics constants were measured by  
 603 using equations described in the supplemental material (TEXT S1).

604 The kinetic model for the inhibition events of CMY-2 activity by the VHHs is described  
 605 in scheme 1 (19) where  $K_i$  corresponds to the dissociation constant of the inhibitor. The  $\alpha$   
 606 parameter is the degree at which the inhibitor influences the affinity of the enzyme for its  
 607 substrate, while the  $\beta$  parameter is the activity of the tertiary complex ESI compared to the  
 608 activity of the complex ES. The constant  $k_p$  corresponds to the turnover rate constant ( $k_{\text{cat}}$ ).  
 609

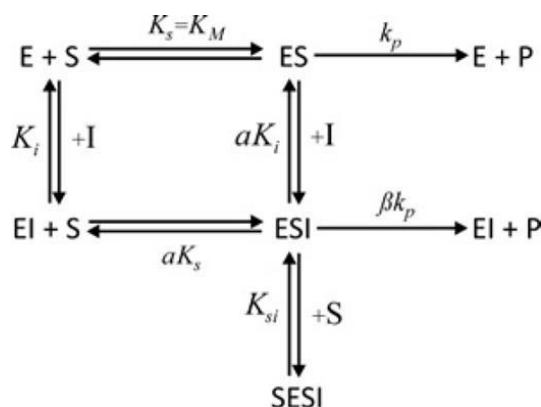

**SCHEME 1.** General kinetic model

## 610 Crystallization conditions

611  
 612 Crystals were grown at 20°C using the sitting drop vapor diffusion method. The drop  
 613 contained 0.2 µL of CMY-2 in complex with VHH cAb<sub>CMY-2</sub>(254) at a concentration of 14  
 614 mg/mL and 0.2 µL of 0.1 M TRIS-HCl pH 8.5 buffer with 1.4M (NH<sub>4</sub>)<sub>2</sub> tartarate. The crystal  
 615 was transferred in a cryo-protectant solution containing 50% (v/v) polyethylene glycol 400 and  
 616 50 % (v/v) glycerol and frozen in liquid nitrogen.

617

## 618 **Data collection, phasing, model building and refinement**

619

620 Data were collected at the Proxima 1 beamline of the Soleil synchrotron (Saint Aubin,  
621 France). Indexing, integration and scaling of the data were performed using XDS (52). Initial  
622 phases were obtained by molecular replacement with the CMY-2 structure (PDB code 1ZC2)  
623 and a lama antibody fragment bound to Galectin 10 (PDB code 6GKU, 53) as a search models  
624 using Phaser (54). The structure was built with Coot (55) and refined with Phenix refine (56).  
625 Figures were prepared using PyMOL (The PyMOL Molecular Graphics System, Version 2.4.1  
626 Enhanced for Mac OS X, Schrödinger, LLC.).

627

## 628 **References**

- 629 1. Jim O'Neill. 2016. Tackling Drug-Resistant Infections Globally. Review on Antimicrobial Resistance.  
630 2. Bush K, Bradford P. 2016.  $\beta$ -lactams and  $\beta$ -lactamases Inhibitors : An Overview. Cold Spring Harb  
631 Perspect Med 6: a025247. <https://doi.org/10.1101/cshperspect.a025247>.
- 632 3. Fisher J, Meroueh S, Mobashery S. 2005. Bacterial Resistance to  $\beta$ -Lactam Antibiotics : Compelling  
633 Opportunism, Compelling Opportunity. Chem. Rev 105 :395-424. <https://doi.org/10.1021/cr030102i>.
- 634 4. Tipper DJ, Strominger JL. 1965. Mechanism of Action of Penicillins: A Proposal Based on their Structural  
635 Similarity to Acyl-D-Alanyl-D-Alanine. PNAS 54(4): 1133-1141. <https://doi.org/10.1073/pnas.54.4.1133>.
- 636 5. Lim D, Strynadka N.C.J. 2002. Structural basis for the  $\beta$ -lactam resistance of PBP2a from methicillin-  
637 resistant *Staphylococcus aureus*. Nature Structural Biology 9(11): 870-76.  
638 <https://doi.org/10.1038/nsb858>.
- 639 6. Sauvage E, Kerff F, Fonzé E, Herman R, Schoot B, Marquette JP, Taburet Y, Prevost D, Dumas J, Leonard  
640 G, Stefanic P, Coyette J, Charlier P. 2002. The 2.4-Å Crystal Structure of the Penicillin-Resistant  
641 Penicillin-Binding Protein PBP5fm from *Enterococcus Faecium* in Complex with Benzylpenicillin. Cellular  
642 and Molecular Life Sciences 59(7): 1223–32. <https://doi.org/10.1007/s00018-002-8500-0>.
- 643 7. Jetter M, Spaniol V, Troller R, Aebi C. 2010. Down-Regulation of Porin M35 in Moraxella Catarrhalis by  
644 Aminopenicillins and Environmental Factors and Its Potential Contribution to the Mechanism of  
645 Resistance to Aminopenicillins. Journal of Antimicrobial Chemotherapy 65(10): 2089–96.  
646 <https://doi.org/10.1093/jac/dkq312>.
- 647 8. Simonet V, Malléa M, Pagès J-M. 2000. Substitutions in the Eyelet Region Disrupt Cefepime Diffusion  
648 through the Escherichia Coli OmpF Channel. Antimicrobial Agents and Chemotherapy 44(2): 311–15.  
649 <https://doi.org/10.1128/AAC.44.2.311-315.2000>.
- 650 9. Hiroshi N, Pagès JM. 2012. Broad-Specificity Efflux Pumps and Their Role in Multidrug Resistance of  
651 Gram-Negative Bacteria. FEMS Microbiology Reviews 36(2): 340–63. [https://doi.org/10.1111/j.1574-](https://doi.org/10.1111/j.1574-6976.2011.00290.x)  
652 [6976.2011.00290.x](https://doi.org/10.1111/j.1574-6976.2011.00290.x).



- 653 10. Bush K. 2018. Past and Present Perspectives on  $\beta$ -Lactamases. *Antimicrobial Agents and Chemotherapy*  
654 62(10). <https://doi.org/10.1128/AAC.01076-18>.
- 655 11. Ambler RP. 1980. The Structure of  $\beta$ -lactamases. *Philos Trans R Soc Lond B Biol Sci* 289:321-331.  
656 <https://doi.org/10.1098/rstb.1980.0049>.
- 657 12. Bush K, Jacoby GA. 2010. Updated Functional Classification of  $\beta$ -lactamases. *Antimicrobial Agents and*  
658 *Chemotherapy* 54:969-976. <https://doi.org/10.1128/AAC.01009-09>.
- 659 13. Vivas R, Barbosa A, Dolabela S, Jain S. 2019. Multidrug-Resistant Bacteria and Alternative Methods to  
660 Control Them: An Overview. *Microbial Drug Resistance* 25(6): 890–908.  
661 <https://doi.org/10.1089/mdr.2018.0319>.
- 662 14. Rudgers G, Huang W, Palzkill T. 2001. Binding Properties of a Peptide Derived from  $\beta$ -Lactamase  
663 Inhibitory Protein. *Antimicrobial Agents and Chemotherapy* 45(12): 3279–86.  
664 <https://doi.org/10.1128/AAC.45.12.3279-3286.2001>.
- 665 15. Dooley H, Flajnik M, Porter A. 2003. Selection and Characterization of Naturally Occurring Single-  
666 Domain (IgNAR) Antibody Fragments from Immunized Sharks by Phage Display. *Molecular Immunology*  
667 40(1): 25–33. [https://doi.org/10.1016/S0161-5890\(03\)00084-1](https://doi.org/10.1016/S0161-5890(03)00084-1).
- 668 16. Muyldermans S. 2013. Nanobodies: Natural Single-Domain Antibodies. *Annual Review of Biochemistry*  
669 82: 775–97. <https://doi.org/10.1146/annurev-biochem-063011-092449>.
- 670 17. Chan PH, Pardon E, Menzer L, De Genst E, Kumita JR, Christodoulou J, Saerens D, Brans A, Bouillenne F,  
671 Archer DB, Robinson CV, Muyldermans S, Matagne A, Redfield C, Wyns L, Dobson CM, Dumoulin M.  
672 2008. Engineering a Camelid Antibody Fragment That Binds to the Active Site of Human Lysozyme and  
673 Inhibits Its Conversion into Amyloid Fibrils. *Biochemistry* 47(42): 11041–54.  
674 <https://doi.org/10.1021/bi8005797>.
- 675 18. Conrath KE, Lauwereys M, Galleni M, Matagne A, Frère JM, Kinne J, Wyns L, Muyldermans S. 2001,  
676 Lactamase Inhibitors Derived from Single-Domain Antibody Fragments Elicited in the Camelidae.  
677 *Antimicrobial Agents and Chemotherapy* 45(10): 2807–12. [https://doi.org/10.1128/AAC.45.10.2807-](https://doi.org/10.1128/AAC.45.10.2807-2812.2001)  
678 [2812.2001](https://doi.org/10.1128/AAC.45.10.2807-2812.2001).
- 679 19. Sohier JS, Laurent C, Chevigné A, Pardon E, Srinivasan V, Wernery U, Lassaux P, Steyaert J, Galleni M.  
680 2013. Allosteric Inhibition of VIM Metallo- $\beta$ -Lactamases by a Camelid Nanobody. *Biochemical Journal*  
681 450(3): 477–86. <https://doi.org/10.1042/BJ20121305>.
- 682 20. Guérin V, Thiry D, Lucas P, Blanchard Y, Cawez F, Mercuri PS, Galleni M, Saulmont M, Mainil J. 2021.  
683 Identification of  $\beta$ -Lactamase-Encoding (bla) Genes in Phenotypically  $\beta$ -Lactam-Resistant *Escherichia*  
684 *coli* Isolated from Young Calves in Belgium. *Microbial Drug Resistance* 27(11): 1578-84.  
685 <https://doi.org/10.1089/mdr.2020.0472>.
- 686 21. Bauvois C, Ikuba AS, Celso A, Alba J, Ishii Y, Frère JM, Galleni M. 2005. *Antimicrobial Agents and*  
687 *Chemotherapy* 49(10): 4240-46. <https://doi.org/10.1128/AAC.49.10.4240-4246.2005>.

- 688 22. Ewers C, De Jong A, Prenger-Berninghoff E, El Garch F, Leidner U, Tiwari SK, Semmler T. 2021. Genomic  
689 Diversity and Virulence Potential of ESBL- and Escherichia Coli Strains From Healthy Food Animals  
690 Across Europe. *Frontiers in Microbiology* 12:626774. [https://doi.org/ 10.3389/fmicb.2021.626774](https://doi.org/10.3389/fmicb.2021.626774).
- 691 23. Pietsch M, Irrgang A, Roschanski N, Michael GB, Hamprecht A, Rieber H, Käsbohrer A, Schwarz S, Rösler  
692 U, Kreienbrock L, Pfeifer Y, Fuchs S, Werner G, RESET Study Group. 2018. Whole Genome Analyses of  
693 CMY-2-Producing Escherichia Coli Isolates from Humans, Animals and Food in Germany. *BMC Genomics*  
694 19(1):1–17. <https://doi.org/10.1186/s12864-018-4976-3>.
- 695 24. Black JA, Thomson KS, Buynak JD, Pitout JDD, 2005, Evaluation of  $\beta$ -Lactamase Inhibitors in Disk Tests  
696 for Detection of Plasmid-Mediated AmpC  $\beta$ -Lactamases in Well-Characterized Clinical Strains of  
697 *Klebsiella* Spp. *Journal of Clinical Microbiology* 43(8):4168–71. [https://doi.org/10.1128/JCM.43.8.4168-](https://doi.org/10.1128/JCM.43.8.4168-4171.2005)  
698 4171.2005.
- 699 25. Pérez-Pérez FJ, Hanson ND. 2002. Detection of Plasmid-Mediated AmpC  $\beta$ -Lactamase Genes in Clinical  
700 Isolates by Using Multiplex PCR. *Journal of Clinical Microbiology* 40(6):2153–62.  
701 <https://doi.org/10.1128/JCM.40.6.2153-2162.2002>.
- 702 26. Tamma PD, Doi Y, Bonomo RA, Johnson JK, Simner PJ. 2019. A Primer on AmpC  $\beta$ -Lactamases:  
703 Necessary Knowledge for an Increasingly Multidrug-Resistant World. *Clinical Infectious Diseases*  
704 69(8):1446–55. <http://doi.org/10.1093/cid/ciz173>.
- 705 27. Conen A, Frei R, Adler H, Dangel M, Fux CA, Widmer AF. 2015. Microbiological Screening Is Necessary to  
706 Distinguish Carriers of Plasmid-Mediated AmpC Beta-Lactamase-Producing Enterobacteriaceae and  
707 Extended-Spectrum Beta-Lactamase (ESBL)-Producing Enterobacteriaceae Because of Clinical Similarity.  
708 *PLoS ONE* 10(3):1–14. <https://doi.org/10.1371/journal.pone.0120688>.
- 709 28. Majewski P, Wieszorek P, Ojdana D, Sieńko A, Kowalczyk O, Sacha P, Nikliński J, Tryniszewska E. 2016.  
710 Altered Outer Membrane Transcriptome Balance with AmpC Overexpression in Carbapenem-Resistant  
711 *Enterobacter Cloacae*. *Frontiers in Microbiology* 7:2054. 1–15.  
712 <https://doi.org/10.3389/fmicb.2016.02054>.
- 713 29. Harris PNA, Alder L, Paterson DL. 2015. Antimicrobial Susceptibility Reporting and Treatment Selection  
714 for AmpC-Producing Enterobacteriaceae: What Do Microbiologists and Infectious Disease Practitioners  
715 Actually Practice? *Pathology* 47(4):386–88. <https://doi.org/10.1097/PAT.000000000000255>.
- 716 30. Pogue JM, Bonomo RA, Kaye KS. 2019. Ceftazidime/Avibactam, Meropenem/Vaborbactam, or Both?  
717 Clinical and Formulary Considerations. *Clinical Infectious Diseases* 68(3):519–24.  
718 <https://doi.org/10.1093/cid/ciy576>.
- 719 31. Rodríguez-Baño J, Gutiérrez-Gutiérrez B, Machuca I, Pascual A. 2018. Treatment of Infections Caused by  
720 Extended-Spectrum-Beta-Lactamase-, AmpC-, and Carbapenemase-Producing *Enterobacteriaceae*.  
721 *Clinical Microbiology Reviews* 31(2):1–42. <https://doi.org/10.1128/CMR.00079-17>.
- 722 32. Lipman NS, Jackson LR, Trudel LJ, Weis-Garcia F. 2005. Monoclonal versus Polyclonal Antibodies:  
723 Distinguishing Characteristics, Applications, and Information Resources. *ILAR Journal* 46(3):258–67.  
724 <https://doi.org/10.1093/ilar.46.3.258>.

- 725 33. Zhao Y, Li G. 2016. Detection of Penicillinase in Milk by Sandwich ELISA Based Polyclonal and  
726 Monoclonal Antibody. *Journal of Immunoassay and Immunochemistry* 37(1):80–89.  
727 <https://doi.org/10.1080/15321819.2015.1050108>.
- 728 34. Morales-Yanez, FJ, Idalia S, Vincke C, Hassanzadeh-Ghassabeh G, Polman K, Muyldermans S. 2019. An  
729 Innovative Approach in the Detection of *Toxocara Canis* Excretory/Secretory Antigens Using Specific  
730 Nanobodies. *International Journal for Parasitology* 49(8):635–45.  
731 <https://doi.org/10.1016/j.ijpara.2019.03.004>.
- 732 35. Ibañez LI, De Filette M, Hultberg A, Verrips T, Temperton N, Weiss RA, Vandevelde W, Schepens B,  
733 Vanlandschoot P, Saelens X. 2011. Nanobodies with in vitro neutralizing activity protect mice against  
734 H5N1 influenza virus **infection**. *J Infect Dis*. 203(8):1063-72. <https://doi.org/10.1093/infdis/jiq168>.
- 735 36. Hultberg A, Temperton NJ, Rosseels V, Koenders M, Gonzalez-Pajuelo M, Schepens B, Ibañez LI,  
736 Vanlandschoot P, Schillemans J, Saunders M, Weiss RA, Saelens X, Melero JA, Verrips CT, Van Gucht S,  
737 de Haard HJ. 2011. Llama-derived single domain antibodies to build multivalent, superpotent and  
738 broadened neutralizing anti-viral molecules. *PLoS One* 6(4).  
739 <https://doi.org/10.1371/journal.pone.0017665>.
- 740 37. Detalle L, Stohr T, Palomo C, Piedra PA, Gilbert BE, Mas V, Millar A, Power UF, Stortelers C, Allosery K,  
741 Melero JA, Depla E. 2015. Generation and Characterization of ALX-0171, a Potent Novel Therapeutic  
742 Nanobody for the Treatment of Respiratory Syncytial Virus Infection. *Antimicrob Agents Chemother*  
743 60(1):6-13. <https://doi.org/10.1128/AAC.01802-15>.
- 744 38. Chen J, He QH, Xu Y, Fu JH, Li YP, Tu Z, Wang D, Shu M, Qiu YL, Yang HW, Liu YY. 2016. Nanobody  
745 medicated immunoassay for ultrasensitive detection of cancer biomarker alpha-fetoprotein. *Talanta*  
746 147:523-30. <https://doi.org/10.1016/j.talanta.2015.10.027>.
- 747 39. Li T, Li SL, Fang C, Hou YN, Zhang Q, Du X, Lee HC, Zhao YJ. 2018. Nanobody-based dual epitopes  
748 protein identification (DepID) assay for measuring soluble CD38 in plasma of multiple myeloma  
749 patients. *Anal Chim Acta* 1029:65-71. <https://doi.org/10.1016/j.aca.2018.04.061>.
- 750 40. Rösner S, Kamalanabhaiah S, Küsters U, Kolbert M, Pfennigwerth N, Mack D. 2019. Evaluation of a  
751 novel immunochromatographic lateral flow assay for rapid detection of OXA-48, NDM, KPC and VIM  
752 carbapenemases in multidrug-resistant Enterobacteriaceae. *J Med Microbiol* 68(3):379-381.  
753 <https://doi.org/10.1099/jmm.0.000925>.
- 754 41. Hujer AM, Page MGP, Helfand MS, Yeiser B, Bonomo RA. 2002. Development of a Sensitive and Specific  
755 Enzyme-Linked Immunosorbent Assay for Detecting and Quantifying CMY-2 and SHV  $\beta$ -Lactamases.  
756 *Journal of Clinical Microbiology* 40(6):1947–57. <https://doi.org/10.1128/JCM.40.6.1947-1957.2002>.
- 757 42. Beadle BM, Trehan I, Focia PJ, Shoichet BK. 2002. Structural Milestones in the Reaction Pathway of an  
758 Amide Hydrolase. *Structure* 10(3):413–24. [https://doi.org/10.1016/s0969-2126\(02\)00725-6](https://doi.org/10.1016/s0969-2126(02)00725-6).
- 759 43. Huang L, So PK, Chen YW, Leung YC, Yao ZP. 2020. Conformational Dynamics of the Helix 10 Region as  
760 an Allosteric Site in Class A  $\beta$ -Lactamase Inhibitory Binding. *J Am Chem Soc* 142(32):13756-13767.  
761 <https://doi.org/10.1021/jacs.0c04088>.

- 762 44. Goulet DR, Chatterjee S, Lee WP, Waight AB, Zhu Y, Mak AN. 2022. Engineering an Enhanced EGFR  
763 Engager: Humanization of Cetuximab for Improved Developability. *Antibodies (Basel)* 11(1):6.  
764 <https://doi.org/10.3390/antib11010006>.
- 765 45. Gilliland LK, Walsh LA, Frewin MR, Wise MP, Tone M, Hale G, Kioussis D, Waldmann H. 1999.  
766 Elimination of the immunogenicity of therapeutic antibodies. *J Immunol* 162(6):3663-71.
- 767 46. Murali R, Greene MI. 2012. Structure based antibody-like peptidomimetics. *Pharmaceuticals (Basel)*  
768 5(2):209-235. <https://doi.org/10.3390/ph5020209>.
- 769 47. Karami E, Sabatier J-M, Behdani M, Irani S, Kazemi-Lomedasht F. 2020. A Nanobody-Derived Mimotope  
770 against VEGF Inhibits Cancer Angiogenesis. *Journal of Enzyme Inhibition and Medicinal Chemistry*  
771 35(1):1233–39. <https://doi.org/10.1080/14756366.2020.1758690>.
- 772 48. Martin C, Moors SLC, Danielsen M, Betti C, Fabris C, Sejer Pedersen D, Pardon E, Peyressatre M, Fehér  
773 K, Martins JC, Mosolff Mathiesen J, Morris MC, Devoogdt N, Caveliers V, De Proft F, Steyaert J, Ballet S.  
774 2017. Rational Design of Nanobody80 Loop Peptidomimetics: Towards Biased  $\beta_2$  Adrenergic Receptor  
775 Ligands. *Chemistry* 23(40):9632-9640. <https://doi.org/10.1002/chem.201701321>.
- 776 49. Geng L, Wang Z, Yang X, Li D, Lian W, Xiang Z, Wang W, Bu X, Lai W, Hu Z, Fang Q. 2015. Structure-  
777 based Design of Peptides with High Affinity and Specificity to HER2 Positive Tumors. *Theranostics*  
778 5(10):1154-65. <https://doi.org/10.7150/thno.12398>.
- 779 50. Ding, H., Gangalum, P. R., Galstyan, A., Fox, I., Patil, R., Hubbard, P., Murali, R., Ljubimova, J. Y., Holler,  
780 E. (2017). HER2-positive breast cancer targeting and treatment by a peptide-conjugated mini  
781 nanodrug. *Nanomedicine : nanotechnology, biology, and medicine*, 13(2), 631–639.  
782 <https://doi.org/10.1016/j.nano.2016.07.013>.
- 783 51. Pardon E, Laeremans T, Triest S, Rasmussen SGF, Wohlkönig A, Ruf A, Muyldermans S, Hol WGJ, Kobilka  
784 BK, Steyaert J. 2014. A General Protocol for the Generation of Nanobodies for Structural Biology.  
785 *Nature Protocols* 9(3):674–93. <https://doi.org/10.1038/nprot.2014.039>.
- 786 52. Kabsch W. 2010. XDS. *Acta Crystallographica Section D: Biological Crystallography* D66:125-132.  
787 <https://doi.org/10.1107/S0907444909047337>.
- 788 53. Persson EK, Verstraete K, Heyndrickx I, Gevaert E, Aegerter H, Percier J-M, Deswarte K, Verschueren  
789 KHG, Dansercoer A, Gras D, Chanez P, Bachert C, Gonçalves A, Van Gorp H, De Haard H, Blanchelot C,  
790 Saunders M, Hammad H, Savvides SN, Lambrecht BN. 2019. *Science* 364(6442).  
791 <https://doi.org/10.1126/science.aaw4295>.
- 792 54. McCoy AJ, Grosse-Kunstleve RW, Adams PD, Winn MD, Storoni LC, Read RJ. 2007. Phaser  
793 Crystallographic Software. *Journal of Applied Crystallography* 40(4):658–74.  
794 <https://doi.org/10.1107/S0021889807021206>.
- 795 55. Emsley P, Lohkamp B, Scott WG, Cowtan K. 2010. Features and Development of Coot. *Acta*  
796 *Crystallographica Section D: Biological Crystallography* 66(4):486–501.  
797 <https://doi.org/10.1107/S0907444910007493>.

798 56. Liebschner D, Afonine PV, Baker ML, Bunkoczi G, Chen VB, Croll TI, Hintze B, Hung LW, Jain S, McCoy AJ,  
799 Moriarty NW, Oeffner RD, Poon BK, Prisant MG, Read RJ, Richardson JS, Richardson DC, Sammito MD,  
800 Sobolev OV, Stockwell DH, Terwilliger TC, Urzhumtsev AG, Videau LL, Williams CJ, Adams PD. 2019.  
801 Macromolecular Structure Determination Using X-Rays, Neutrons and Electrons: Recent Developments  
802 in Phenix. *Acta Crystallographica Section D: Structural Biology* 75:861–77.  
803 <https://doi.org/10.1107/S2059798319011471>.

804

805

806

807

808

809

## 810 **Acknowledgments**

811

812 We thank the Protein Factory Platform at University of Liège for providing material  
813 necessary for protein purification and to provide some purified  $\beta$ -lactamases necessary for the  
814 specificity binding experiments. We would like also to thank the Robotein Platform for the  
815 opportunity to use the OCTET HTX robot necessary for all binding characterizations.

816 This work was supported by the Belgian Federal Public Service Health, Food Chain Safety and  
817 Environment [Grant No. RF 17/6317 RU-BLA-ESBL-CPE] and the FNRS [Grant J0081-20-  
818 CDR].

819

820

821

822

823

824

825

826

827

828

829

830

831

832

833

## Legends to figures

834

835 **FIG 1.** Sequence alignment of VHHs directed against CMY-2. FR: framework, CDR: complementarity  
836 determining region.

837

838 **FIG 2** Binding characterization of the three selected VHHs by bio-layer interferometry. Qualitative  
839 binding specificity of (A) cAb<sub>CMY-2</sub>(250), (B) cAb<sub>CMY-2</sub>(254) and (C) cAb<sub>CMY-2</sub>(272), respectively.  
840 Names and classes (in brackets) of the tested  $\beta$ -lactamases are indicated on the figure. Quantitative  
841 binding measurements of (D) cAb<sub>CMY-2</sub>(250), (E) cAb<sub>CMY-2</sub>(254) and (F) cAb<sub>CMY-2</sub>(272), respectively.  
842 The experimental data ( $\Delta\lambda$ , blue) recorded with seven different concentrations were fitted using a 1:1  
843 binding model (red). The negative control (CTRL -, green) corresponds to CMY-2 directly loaded on  
844 the bio-sensor. Those experiments were carried out twice independently.

845

846 **FIG 3** Competition binding assay between VHHs directed against CMY-2 monitored by BLI. The  
847 biotinylated VHH cAb<sub>CMY-2</sub>(254) was loaded on a streptavidine bio-sensor (SA sensor) while the analyte  
848 corresponds to complexes cAb<sub>CMY-2</sub>(250)/CMY-2 (brown), cAb<sub>CMY-2</sub>(254)/CMY-2 (blue) and cAb<sub>CMY-2</sub>(272)/CMY-2 (purple) in different molar ratios. The negative control (CTRL -, green) corresponds to  
849 the signal recorded when the complex cAb<sub>CMY-2</sub>(254)/CMY-2 was directly loaded on the non-  
850 functionalized bio-sensor. All the binding rates were calculated by fitting a simple exponential  
851 mathematic model to the first 120 seconds of the association phase. This experiment was realized twice  
852 independently.

853

854 **FIG 4** Binding properties of rabbit polyclonal antibodies directed against the  $\beta$ -lactamase CMY-2 (anti-  
855 CMY-2 pAbs). (A) Indirect ELISA where the antigens were absorbed on a maxisorp plate (except for  
856 the CTRL -) to investigate the specificity of pAbs. Values correspond to means and standard deviations  
857 from duplicates. (B) Qualitative binding specificity assay of pAbs for CMY-2 monitored by BLI. (C)  
858 Quantitative binding measurements of pAbs for CMY-2 realized by BLI. The experimental data ( $\Delta\lambda$ ,  
859 blue) recorded with five different concentrations were fitted using a 1:1 binding model (red). The  
860 negative control (CTRL -, green) corresponds to anti-CMY-2 pAbs directly loaded on the bio-sensor.  
861 The BLI experiments were realized twice independently.

862

863 **FIG 5** Sandwich ELISA on purified enzymes for CMY-2 detection. (A) Limits of detection (LOD)  
864 where VHH cAb<sub>CMY-2</sub>(254) was employed as antibody for capture and pAbs for detection (blue full line)  
865 or inversely (blue dotted line). Curves were fitted with equation I (TEXT. S1). The inset includes the  
866 Abs<sup>450</sup> for the negative control (CTRL -). The LOD was calculated from an average Abs<sup>450</sup> of the CTRL  
867 (-) plus three times the standard deviation. They are represented in red full and dotted lines for VHH  
868 used as capture and detection antibody, respectively. (B) Specificity assessment using the VHH cAb<sub>CMY-2</sub>(254)  
869 as capture agent and the pAbs for revelation (grey) or inversely (grey, pattern). In both  
870 experiments, the CTRL - corresponds to the same ELISA without antigen. All averages and standard  
871 deviations are results from at least twice measurements.

872 CAP: capture, REV: revelation.

873

874

875 **FIG 6** Quantitative binding measurements of the monovalent VHH cAb<sub>CMY-2</sub>(254) (A) and the bivalent  
876 VHH cAb<sub>CMY-2</sub>(254)<sub>BIV</sub> (B) performed by BLI. The experimental data ( $\Delta\lambda$ , blue) recorded with five  
877



878 different concentrations were fitted using a 1:1 binding model (red). The negative control (CTRL -,  
879 green) corresponds to VHHs directly loaded on the bio-sensor. Experiments were realized twice  
880 independently.

881  
882 **FIG 7** Sandwich ELISA for CMY-2 detection using the bivalent VHH cAb<sub>CMY-2</sub>(254)<sub>BIV</sub> (A) Limits of  
883 detection where the VHH cAb<sub>CMY-2</sub>(254)<sub>BIV</sub> was used as antibody for capture and pAbs for detection  
884 (blue full line) or inversely (blue dotted line). The inset includes the Abs<sup>450</sup> for the negative control  
885 (CTRL -). The LOD was calculated from an average Abs<sup>450</sup> of the CTRL (-) plus three times the standard  
886 deviation. They are represented in red full and dotted lines for VHH used as capture and detection  
887 antibody, respectively. (B) Specificity measurement by use of the VHH cAb<sub>CMY-2</sub>(254)<sub>BIV</sub> as antibody  
888 for capture and the pAbs for the detection (grey) or inversely (pattern, grey). The negative control  
889 (CTRL -) corresponds to the ELISA without antigen. All averages and standard deviations are results  
890 from at least twice measurements.  
891 CAP: capture, REV: revelation.

892  
893 **FIG 8** Residual activity of CMY-2 in complex with cAb<sub>CMY-2</sub>(254) for  $\beta$ -lactam ring substrates.  
894 Substrates corresponded to ampicillin (blue line), cefalotin (brown line) and cephaloridin (purple line)  
895 at 100  $\mu$ M and nitrocefin (orange line) at 40  $\mu$ M. Concentrations of CMY-2 used for each substrate  
896 described above were 5 nM, 1 nM, 0.2 nM and 0.5 nM, respectively. All data were fitted on a one phase  
897 exponential decay equation from graph prism program with values resulted from two experiments  
898 realized independently.

899  
900 **FIG 9** Inhibitory model of CMY-2 activity for the nitrocefin by the VHH cAb<sub>CMY-2</sub>(254). (A)  $K_m^{app}$   
901 (blue line) and  $k_{cat}^{app}$  (brown line) parameters derived from the complete hydrolysis of 40  $\mu$ M of  
902 nitrocefin by CMY-2 in complex with the VHH cAb<sub>CMY-2</sub>(254). Experiments were performed using  
903 CMY-2 at a concentration of 0.5 nM.  $k_{cat}^{app}$  data were fitted using the one phase exponential decay  
904 equation from graph prism. (B) Trend of  $1/k_{cat}^{app}$  values in function of VHH cAb<sub>CMY-2</sub>(254)  
905 concentration. All values resulted from three independent experiments.

906  
907 **FIG 10** Inhibitory model for CMY-2 activity for the cephaloridin (A), the cefalotin (B) and the  
908 ampicillin (C) by cAb<sub>CMY-2</sub>(254).  $k_{cat}^{app}$  (blue) and  $1/k_{cat}^{app}$  (brown) parameters were obtained from the  
909 linear phase (equation III, TEXT. S1) of hydrolysis of the corresponding substrate. Concentrations of  
910 CMY-2 were at 0.2 nM, 1 nM and 5 nM for cephaloridin, cefalotin and ampicillin, respectively.

911  
912 **FIG 11** Binding molecular characterization of the complex cAb<sub>CMY-2</sub>(254)/CMY-2. (A) Cartoon  
913 representing the overall view of the complex cAb<sub>CMY-2</sub>(254)/CMY-2. (B) Surface representation of  
914 CMY-2 in the complex cAb<sub>CMY-2</sub>(254)/CMY-2. (C) Hydrophobic interactions between the CDR1 and  
915 the N-terminal extremity of the VHH and CMY-2. (D) Hydrogen bonds (H-bonds) between the CDR3  
916 of the VHH and CMY-2. CDR1, CDR2 and CDR3 of the VHH are colored in purple, green and cyan,  
917 respectively, while frameworks are represented in yellow. CMY-2 is representing in grey while residues  
918 constituting the motif 1 (S<sub>64</sub>XXK<sub>67</sub>), the motif 2 (Y<sub>150</sub>XN<sub>152</sub>) and the motif 3 (K<sub>315</sub>T<sub>316</sub>G<sub>317</sub>) of the CMY-  
919 2 active site are colored in orange. Hydrogen bonds are highlighted by a red dotted line. Residues G108  
920 and D109 from the CDR3 of the VHH cAb<sub>CMY-2</sub>(254) are not illustrated in the model due to a lack of  
921 information in the electronic density.

922  
923 **FIG 12** Superposition of complex cAb<sub>CMY-2</sub>(254)/CMY-2 and P99 (PDB code 1XX2) (A) and CMY-  
924 10 (PDB code 1ZKJ) (B). CMY-2, P99 and CMY-10 are colored in grey, red and magenta. Only the

925 CDR3 of the VHH is illustrated in cyan and active site residues in orange. H-bonds are represented by  
926 a red dashed line.

927

928 **FIG 13** Superposition of the complex cAb<sub>CMY-2</sub>(254)/CMY-2 and the crystal structure of AmpC WT  $\beta$ -  
929 lactamase from *E. coli* in complex with a covalently bound cefalotin (PDB code 1KVM). CMY-2 is  
930 colored in grey, the AmpC in blue, the cefalotin in green and the CDR3 of the VHH is illustrated in  
931 cyan.

932

|                            |       |                                  |                  |                |                       |
|----------------------------|-------|----------------------------------|------------------|----------------|-----------------------|
| <b>cAb<sub>CMY-2</sub></b> | (250) | QVQLVESGGGLVQPGGSLRLSCAAS        | GSIFSIYGMG       | WYRQAPGKQRELVA | EITS-GGSTNYADSVKG     |
| <b>cAb<sub>CMY-2</sub></b> | (254) | QVQLVESGGGMVQPGGSLRLSCAAS        | GFTFSNYDMS       | WVRRAPGKGPEWVS | TINTGGGSTSYADSVKG     |
| <b>cAb<sub>CMY-2</sub></b> | (272) | QVQLVESGGGLVQPGGSLRLSCAAS        | GSIFMIYAMG       | WYRQAPGKQRELVA | DITS-GGSTDYTDSVKG     |
|                            |       | <b>FR1</b>                       | <b>CDR1</b>      | <b>FR2</b>     | <b>CDR2</b>           |
| <b>cAb<sub>CMY-2</sub></b> | (250) | RFTISRDNAKNTVYLQMNLSLPEDTAVYYCN  | ADGT----MWGAGDY  | WGQGTQVTVSS    | HHHHHH <sup>129</sup> |
| <b>cAb<sub>CMY-2</sub></b> | (254) | RFTISRDNAKNTLYLQMNLSLPEDTALYYCT  | IDRGLHYSIDLGEYDY | WGQGTQVTVSS    | HHHHHH                |
| <b>cAb<sub>CMY-2</sub></b> | (272) | RFTISRDR--KNTVYLQMNLSLPEDTAVYYCN | ADHG----PGFGYDY  | WGQGTQVTVSS    | HHHHHH                |
|                            |       | <b>FR3</b>                       | <b>CDR3</b>      | <b>FR4</b>     |                       |

Figure 1. Cawez et al

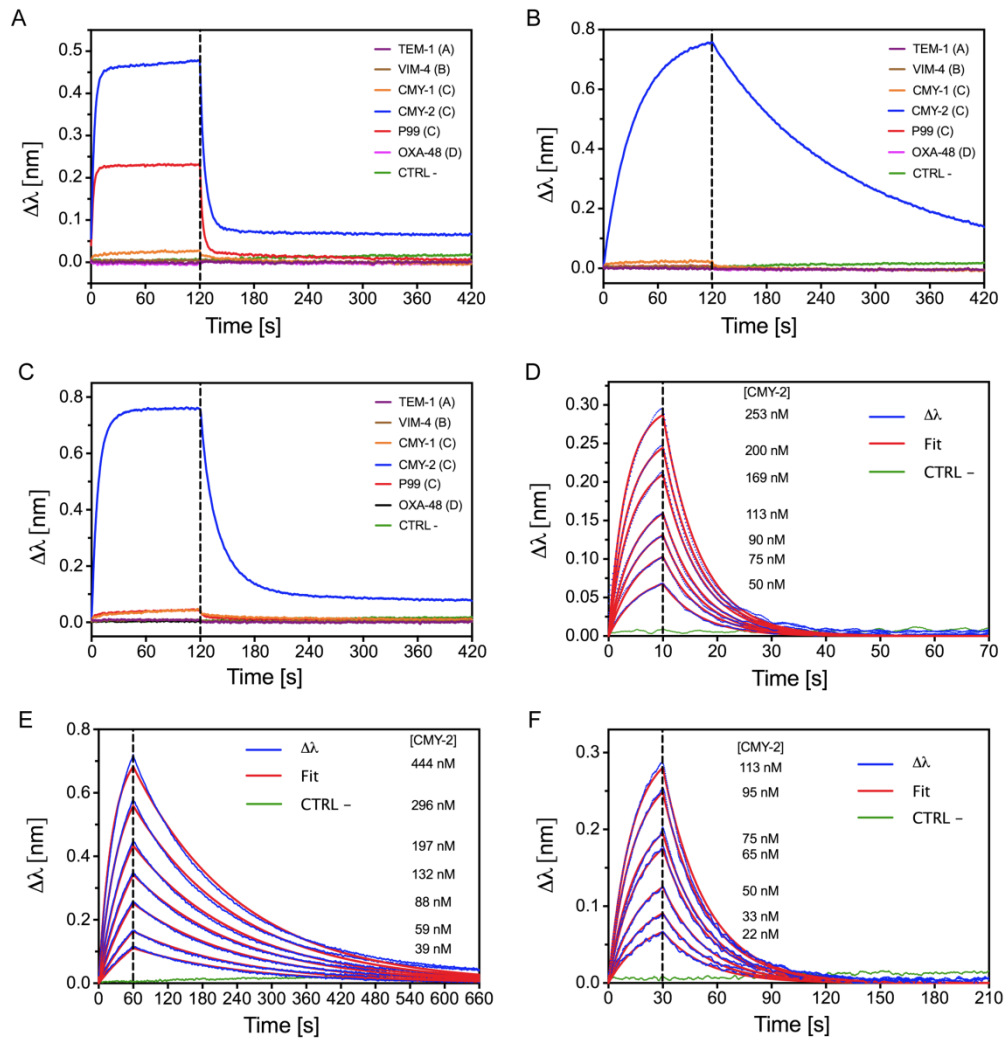

Figure 2. Cawez et al

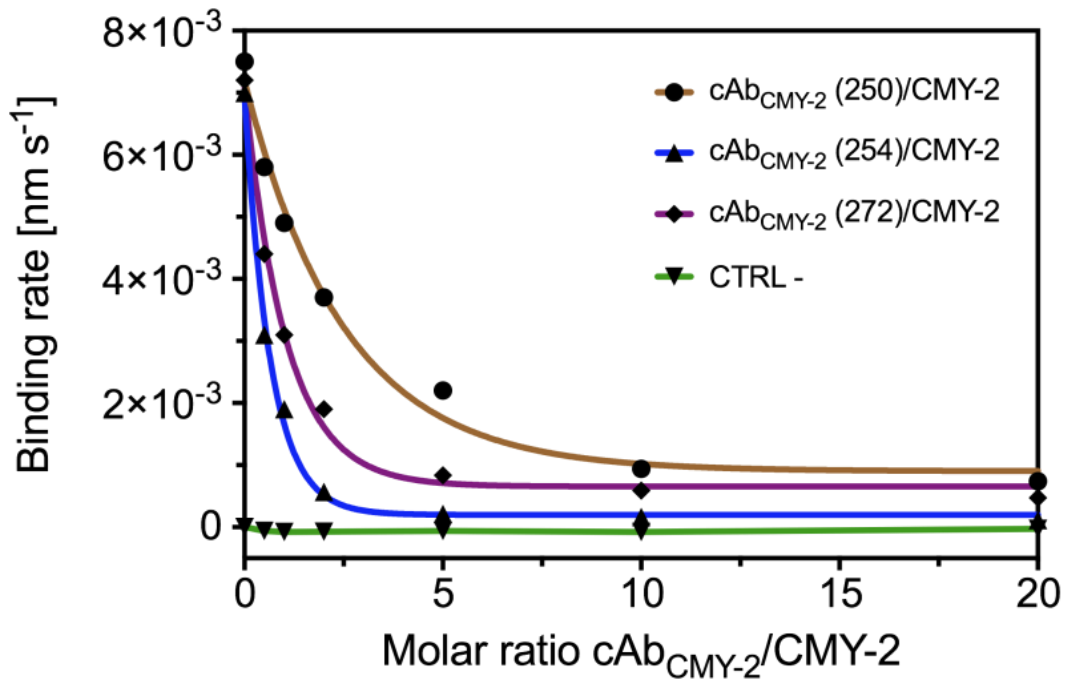

Figure 3. Cawez et al

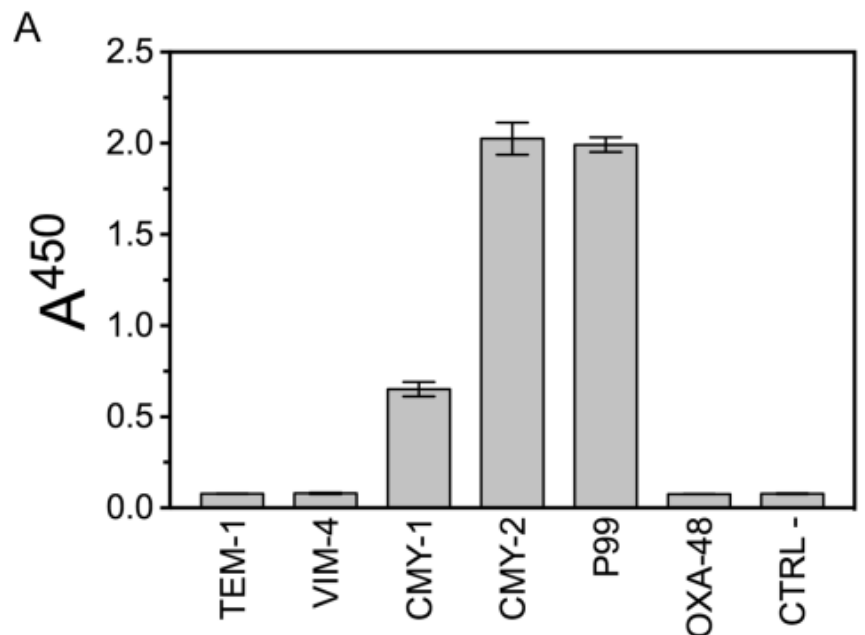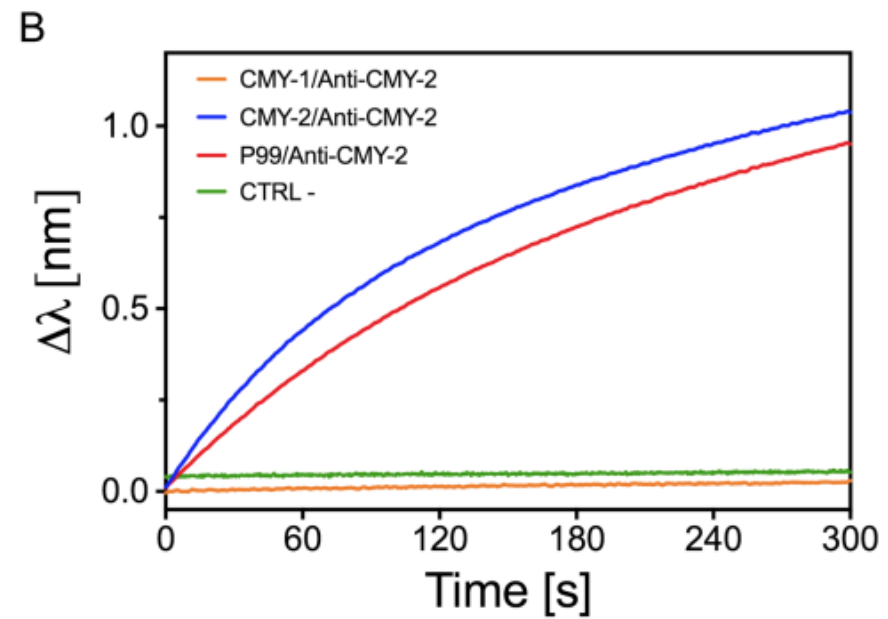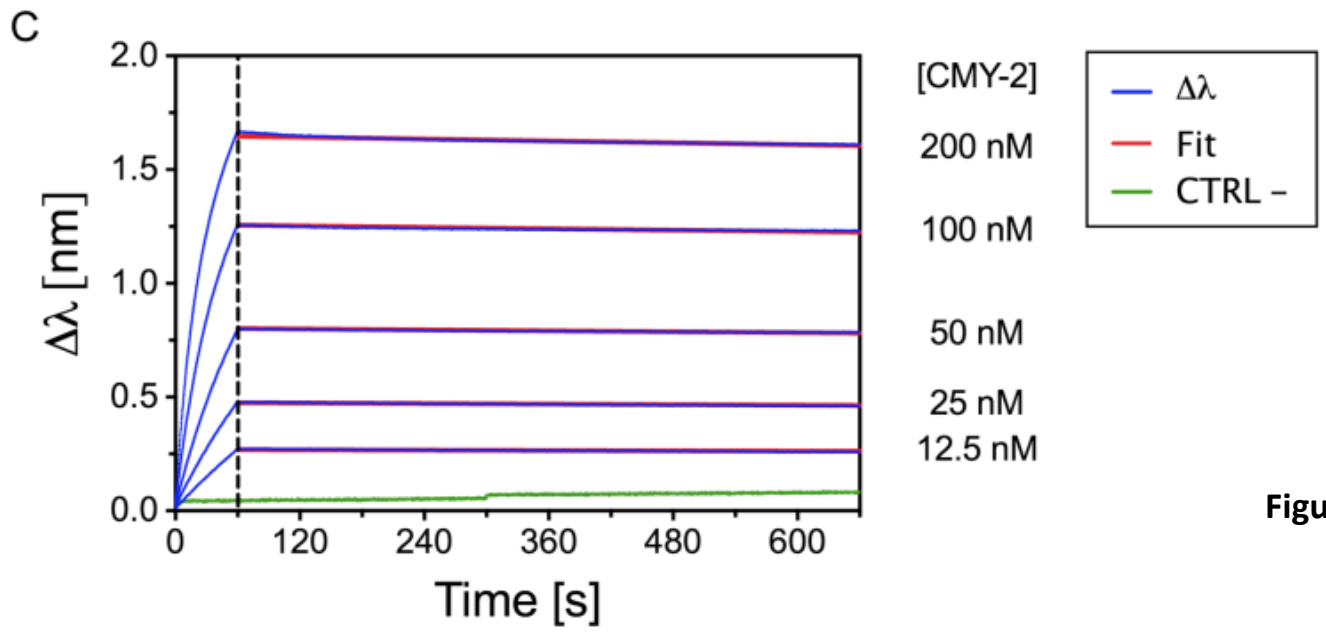

Figure 4. Cawez et al



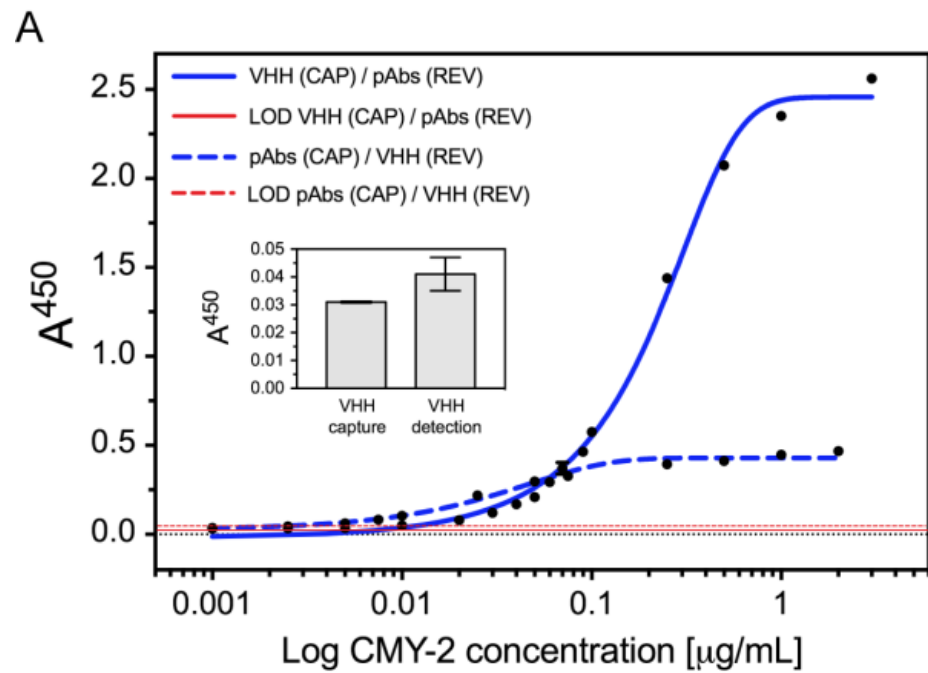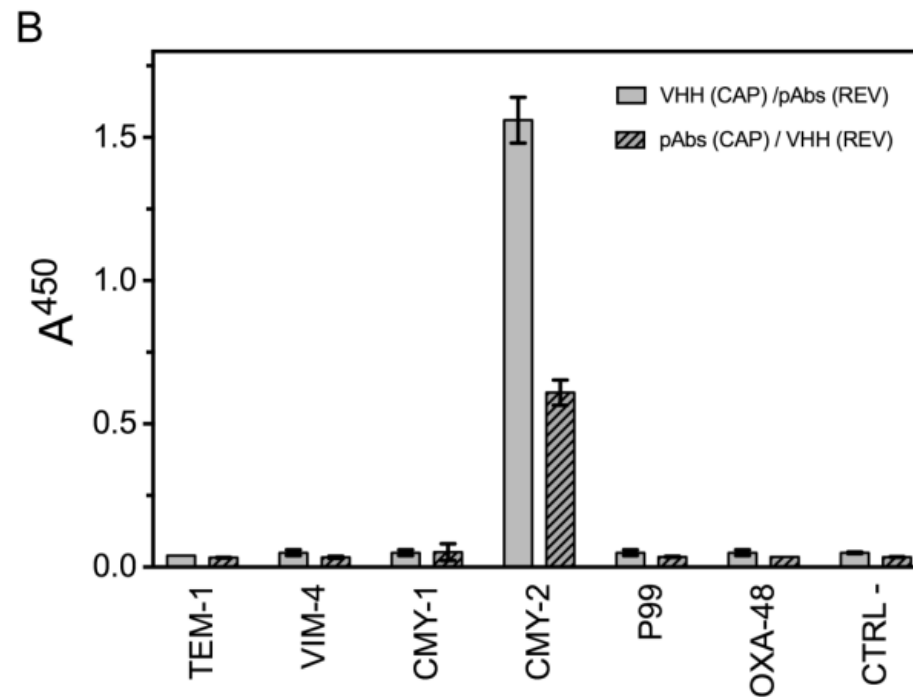

Figure 5. Cawez et al

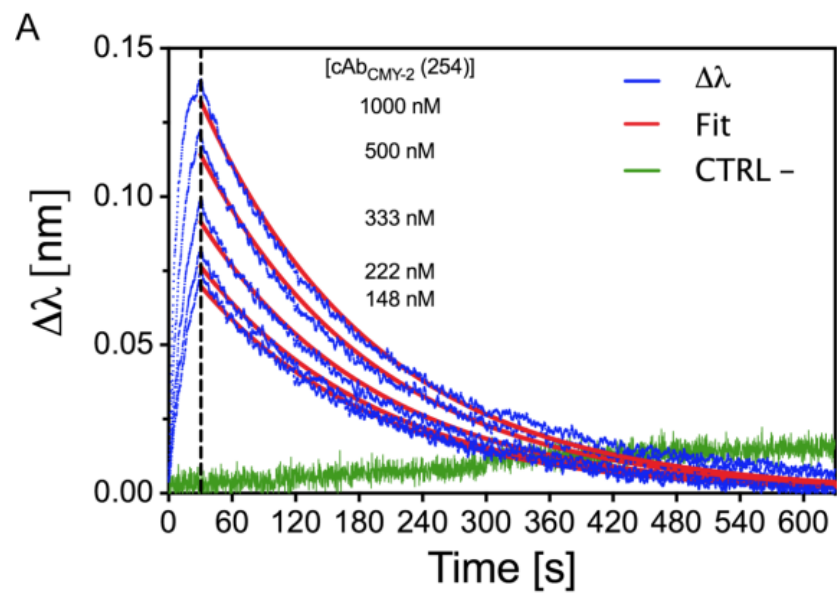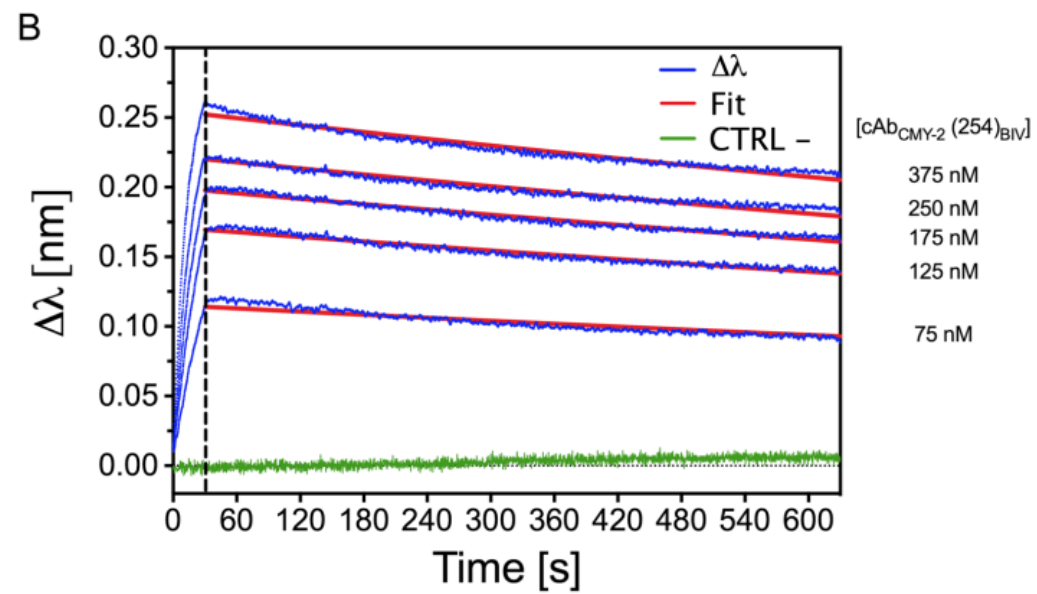

Figure 6. Cawez et al

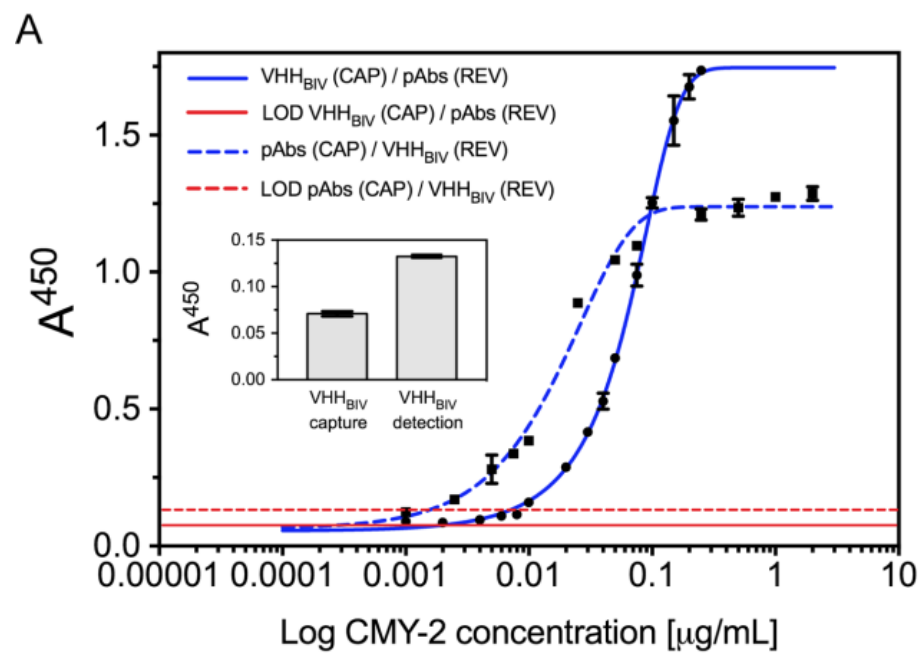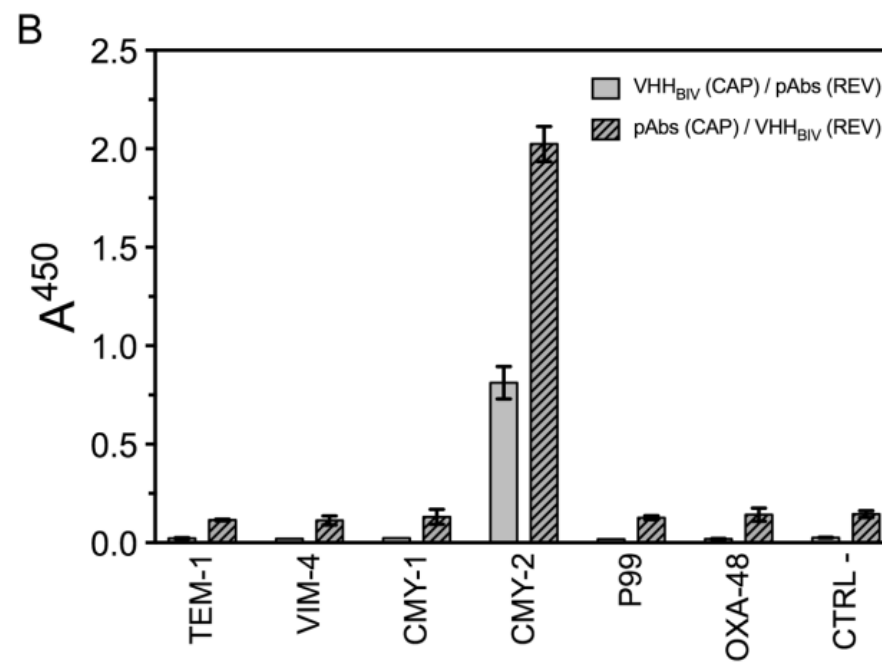

Figure 7. Cawez et al

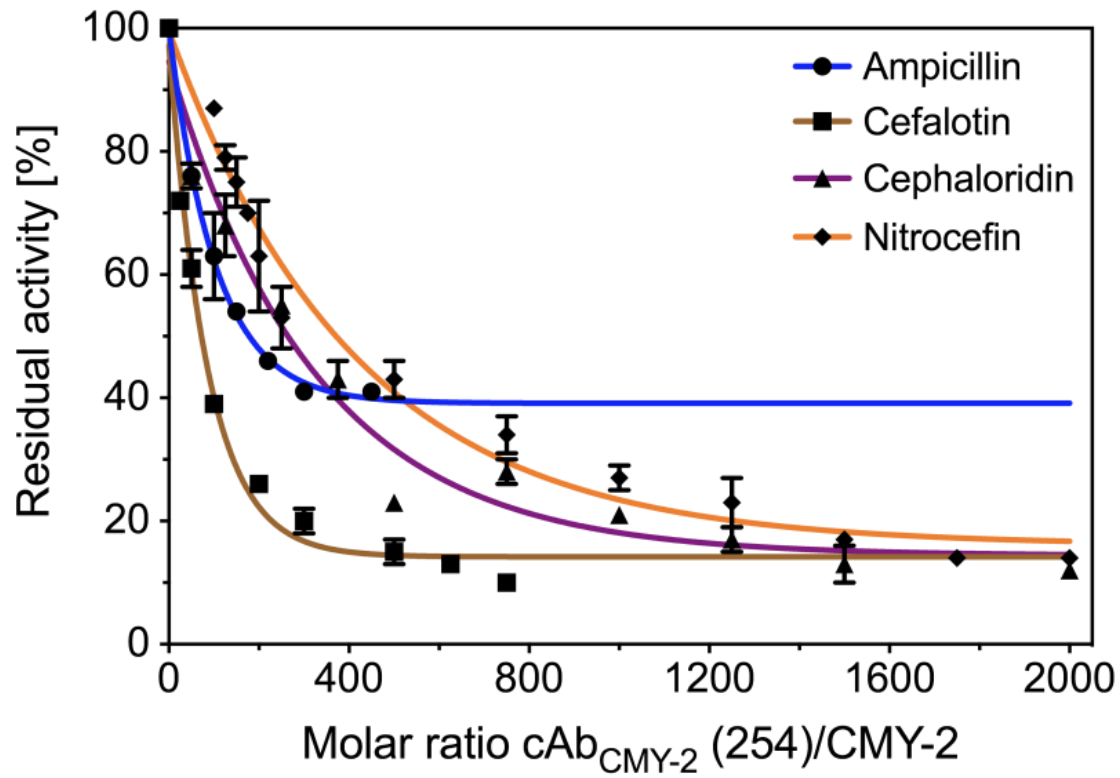

Figure 8. Cawez et al

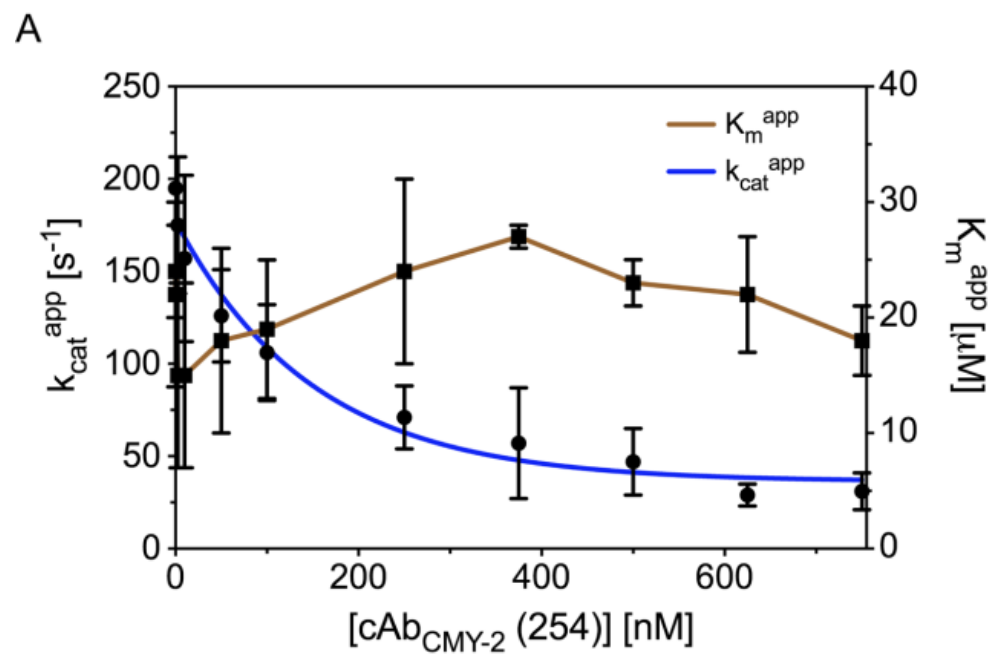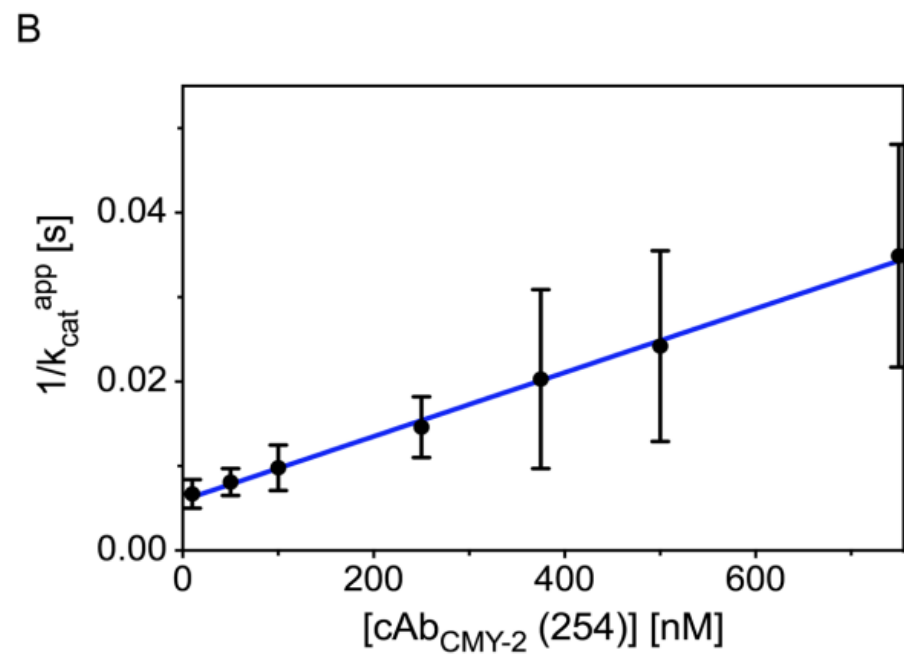

Figure 9. Cawez et al

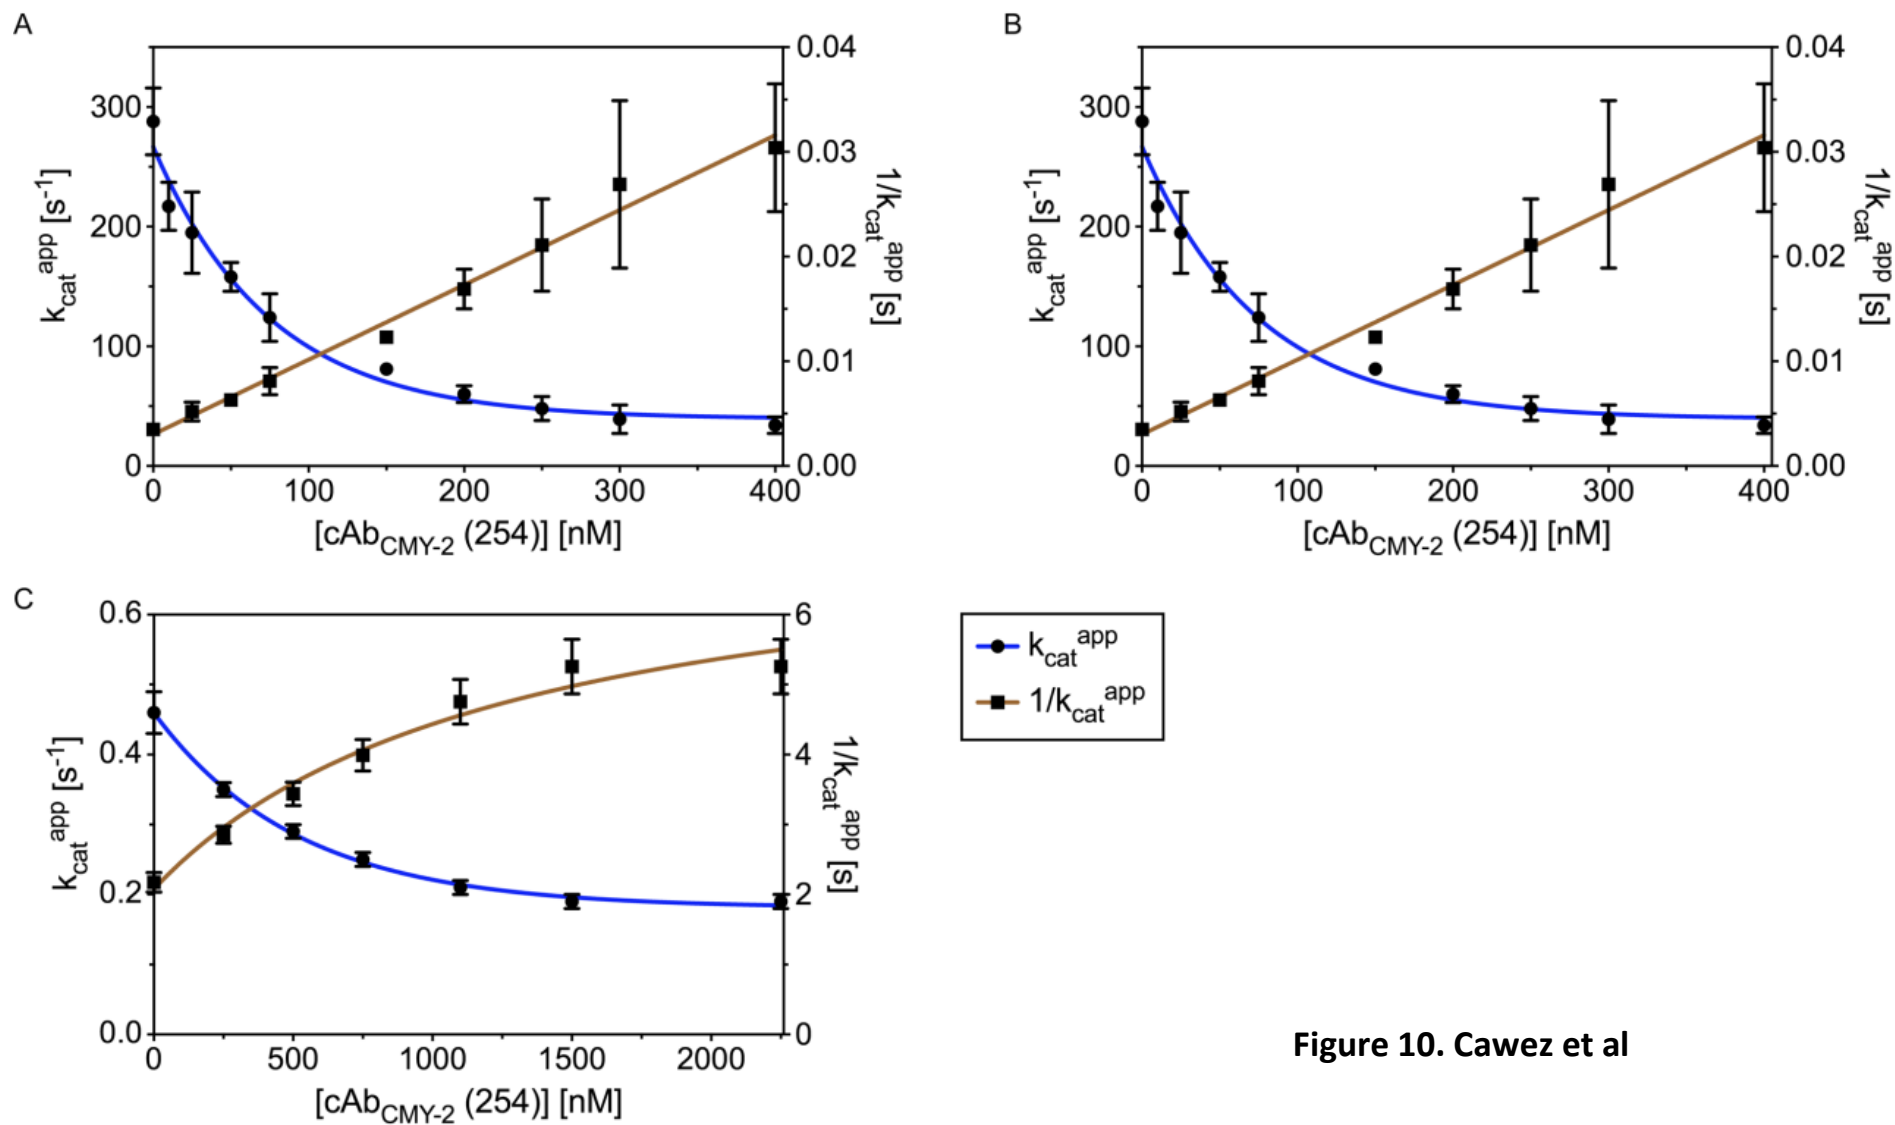

Figure 10. Cawez et al

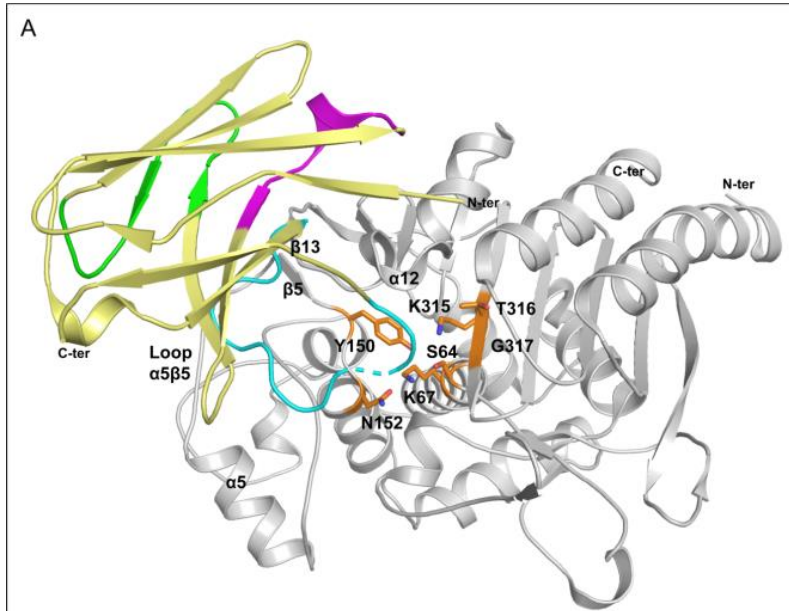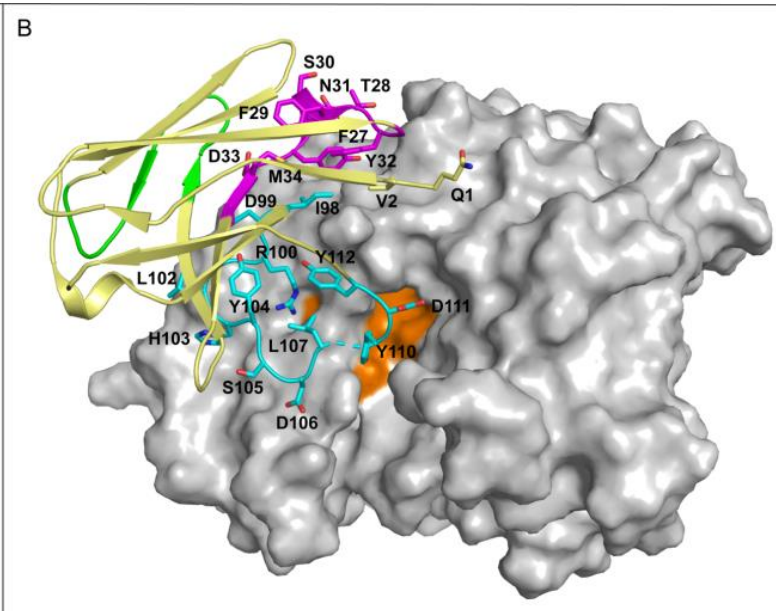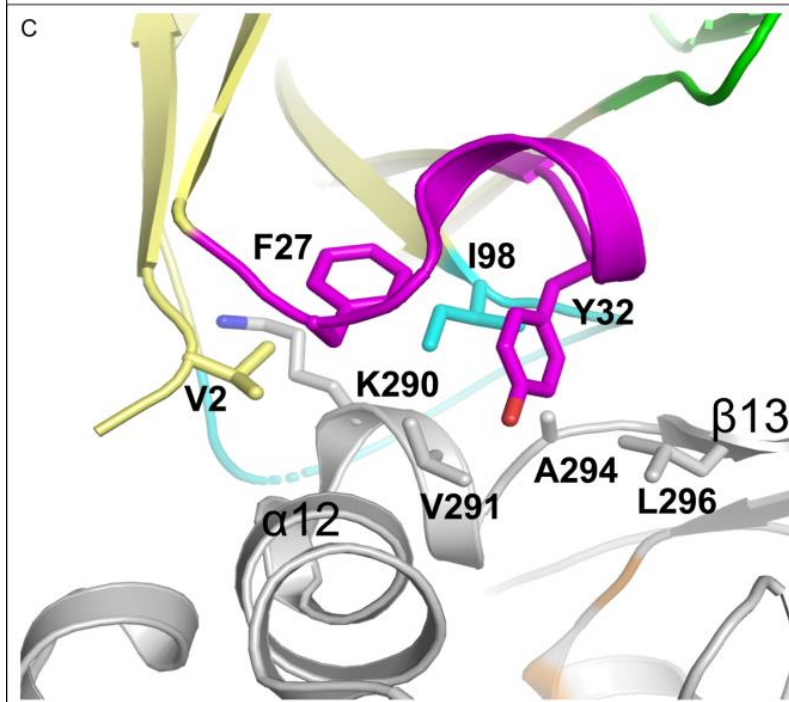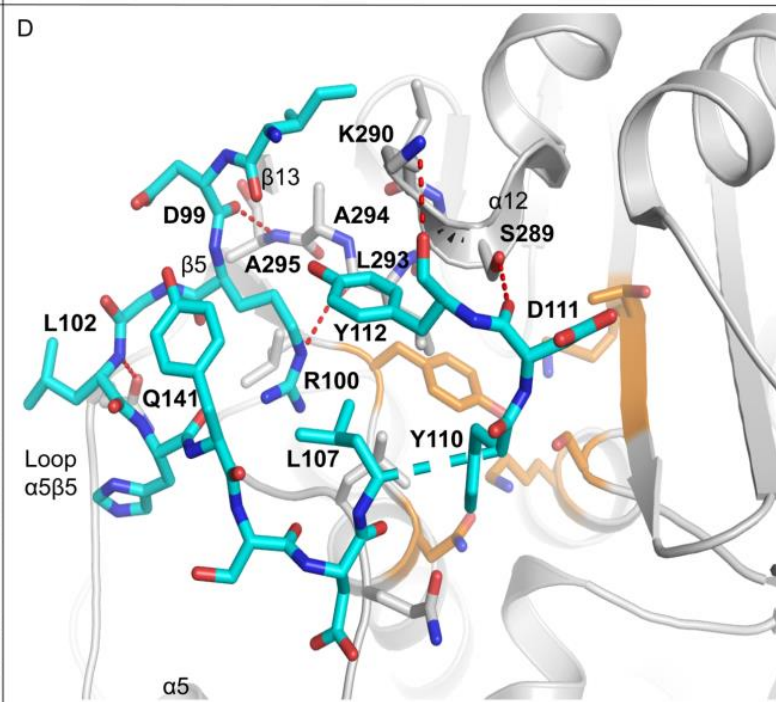



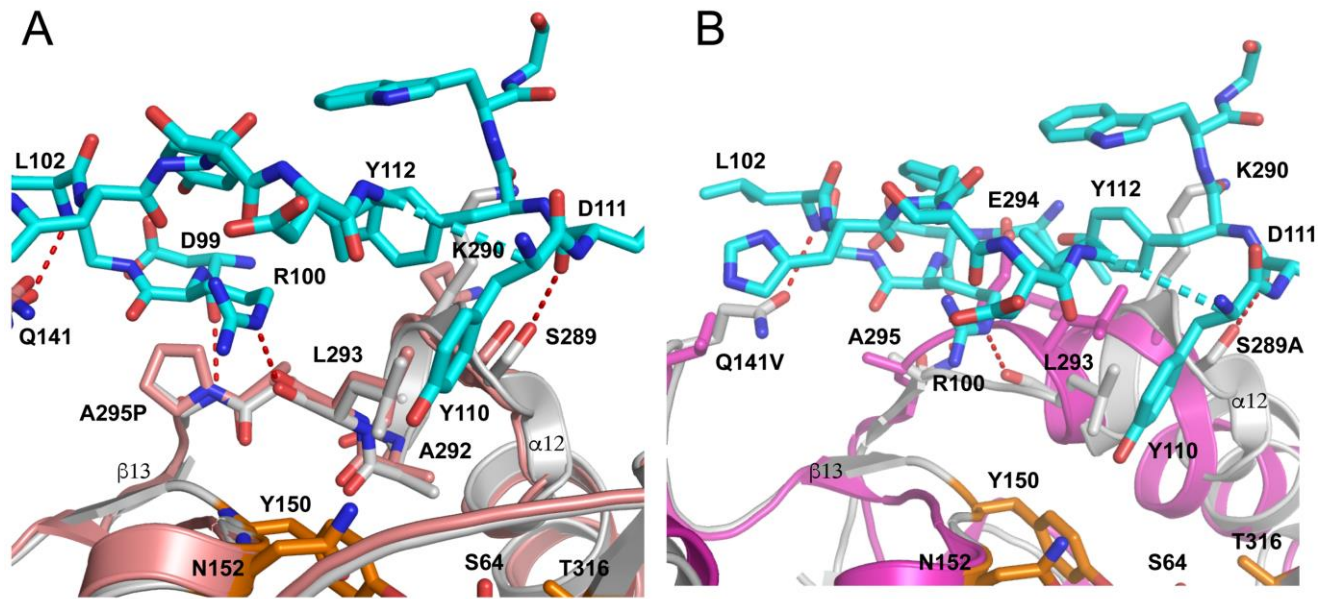

Figure 12. Cawez et al

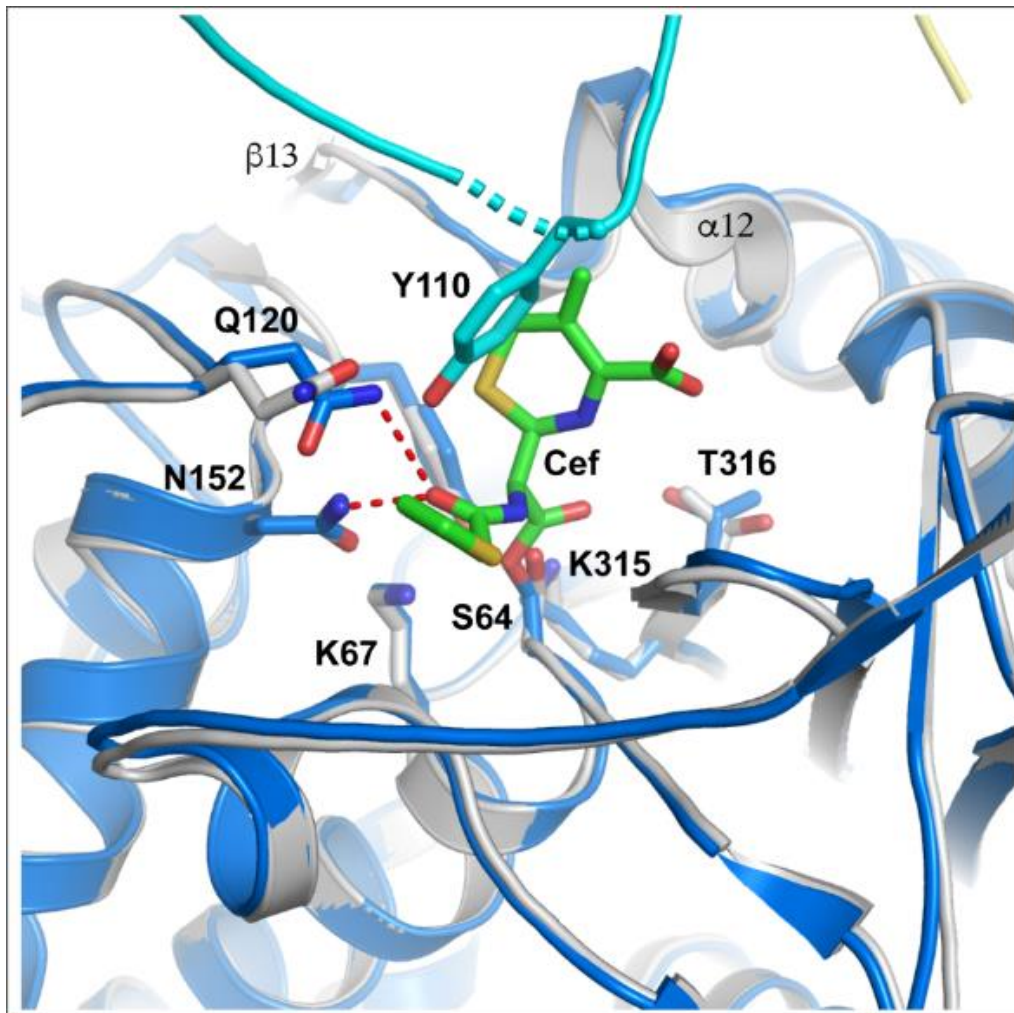

**TABLE 1** Kinetic ( $k_{on}$ ,  $k_{off}$ ) and equilibrium ( $K_D$ ) constants determined by BLI.  $k_{on}$  and  $k_{off}$  values obtained were derived from a global fit of at least seven analyte concentrations (i.e. with 7 analyte concentrations illustrated on sensorgrams in Fig. 2) with the equation of a 1:1 binding model. All values described in the table above include averages and standard deviations calculated from two independent experiments.

|                            | $k_{on}$ ( $10^5 \text{ M}^{-1} \text{ s}^{-1}$ ) | $k_{off}$ ( $10^{-3} \text{ s}^{-1}$ ) | $K_D$ (nM)   |
|----------------------------|---------------------------------------------------|----------------------------------------|--------------|
| cAb <sub>CMY-2</sub> (250) | $6.6 \pm 0.1$                                     | $140 \pm 10$                           | $220 \pm 10$ |
| cAb <sub>CMY-2</sub> (254) | $0.9 \pm 0.1$                                     | $5.9 \pm 0.7$                          | $66 \pm 1$   |
| cAb <sub>CMY-2</sub> (272) | $3.7 \pm 0.5$                                     | $36 \pm 9$                             | $100 \pm 40$ |

**Table 1. Cawez et al**

**TABLE 2.** Detection of CMY-2 sub-group  $\beta$ -lactamases in bovine and human bacterial isolates by a sandwich ELISA. All positive strains in the ELISA are indicated in bold.

| Bacterial isolates <sup>a</sup>                  | Species              | Detected <i>bla</i> genes <sup>b,c</sup>         | A <sup>450</sup>   |                | A <sup>450</sup>           |                | A <sup>450</sup>   |                              |
|--------------------------------------------------|----------------------|--------------------------------------------------|--------------------|----------------|----------------------------|----------------|--------------------|------------------------------|
|                                                  |                      |                                                  | VHH capture        | pAbs detection | VHH <sub>biv</sub> capture | pAbs detection | pAbs capture       | VHH <sub>biv</sub> detection |
| PEP031                                           | <i>E. coli</i>       | TEM-1, CTX-M-15, NDM-1, CMY-58, OXA-1            | <b>1.28 ± 0.01</b> |                | <b>1.60 ± 0.03</b>         |                | <b>1.96 ± 0.03</b> |                              |
| PEP135                                           | <i>E. coli</i>       | TEM-1, NDM-1, CMY-16, OXA-10                     | <b>0.94 ± 0.05</b> |                | <b>1.37 ± 0.01</b>         |                | <b>1.88 ± 0.06</b> |                              |
| PEP175                                           | <i>K. pneumoniae</i> | TEM-1, SHV-1, CTX-M-15, NDM-1, CMY-2, DHA, OXA-9 | 0.06 ± 0.00        |                | <b>0.12 ± 0.01</b>         |                | <b>0.55 ± 0.05</b> |                              |
| PEP224                                           | <i>E. coli</i>       | TEM, NDM-5, CMY-2-like                           | 0.06 ± 0.00        |                | <b>0.24 ± 0.03</b>         |                | <b>0.69 ± 0.04</b> |                              |
| PEP202                                           | <i>E. coli</i>       | CMY-60                                           | <b>1.10 ± 0.04</b> |                | <b>1.67 ± 0.06</b>         |                | <b>1.37 ± 0.02</b> |                              |
| PEP203                                           | <i>E. coli</i>       | CMY-61                                           | <b>1.42 ± 0.01</b> |                | <b>1.78 ± 0.01</b>         |                | <b>2.05 ± 0.00</b> |                              |
| PEP205                                           | <i>K. pneumoniae</i> | SHV-11, CMY-2                                    | <b>1.08 ± 0.03</b> |                | <b>1.62 ± 0.01</b>         |                | <b>2.03 ± 0.06</b> |                              |
| PEP206                                           | <i>E. coli</i>       | OXA-1, CMY-42                                    | <b>0.41 ± 0.02</b> |                | <b>1.13 ± 0.05</b>         |                | <b>1.87 ± 0.04</b> |                              |
| PEP207                                           | <i>P. mirabilis</i>  | CMY-2                                            | <b>1.37 ± 0.03</b> |                | <b>1.72 ± 0.00</b>         |                | <b>1.89 ± 0.03</b> |                              |
| PEP218                                           | <i>E. coli</i>       | TEM-39, TEM-84, CMY-2                            | <b>0.27 ± 0.02</b> |                | <b>0.85 ± 0.01</b>         |                | <b>1.58 ± 0.10</b> |                              |
| PEP234                                           | <i>K. pneumoniae</i> | TEM, SHV, CTX-M (G1), VIM-19, CMY-2              | <b>0.12 ± 0.01</b> |                | <b>0.41 ± 0.00</b>         |                | <b>0.97 ± 0.01</b> |                              |
| PEP235                                           | <i>E. coli</i>       | VIM-19, CMY-2                                    | <b>0.19 ± 0.00</b> |                | <b>0.67 ± 0.01</b>         |                | <b>1.81 ± 0.06</b> |                              |
| PEP006                                           | <i>C. freundii</i>   | TEM-1, CMY-2-like                                | <b>1.28 ± 0.06</b> |                | <b>1.82 ± 0.03</b>         |                | <b>2.01 ± 0.03</b> |                              |
| PEP157                                           | <i>C. freundii</i>   | TEM-1, CTX-M-9, CMY-2-like, OXA-9, OXA-48        | 0.05 ± 0.00        |                | <b>0.12 ± 0.00</b>         |                | <b>0.67 ± 0.03</b> |                              |
| CP40                                             | <i>E. coli</i>       | TEM-1, OXA-1, OXA-1-like, CMY-2                  | 0.04 ± 0.00        |                | 0.06 ± 0.00                |                | 0.08 ± 0.01        |                              |
| CP42                                             | <i>E. coli</i>       | TEM-1, CMY-2                                     | <b>0.18 ± 0.01</b> |                | <b>0.43 ± 0.01</b>         |                | <b>1.46 ± 0.04</b> |                              |
| Col20140084                                      | <i>C. freundii</i>   | TEM-1, CTX-M-15, OXA-1/9/10, CMY-2               | 0.04 ± 0.01        |                | <b>0.08 ± 0.01</b>         |                | <b>1.76 ± 0.02</b> |                              |
| Col20140087                                      | <i>K. pneumoniae</i> | TEM-1, CTX-M-9/15, SHV-1, CMY-2                  | <b>0.86 ± 0.11</b> |                | <b>1.39 ± 0.01</b>         |                | <b>1.87 ± 0.07</b> |                              |
| RUBLA0884                                        | <i>E. coli</i>       | TEM-1, CMY-2                                     | <b>0.45 ± 0.03</b> |                | <b>1.19 ± 0.00</b>         |                | <b>1.76 ± 0.04</b> |                              |
| RUBLA0945                                        | <i>E. coli</i>       | TEM-1, CMY-2                                     | <b>0.25 ± 0.02</b> |                | <b>0.87 ± 0.05</b>         |                | <b>1.58 ± 0.17</b> |                              |
| RUBLA1013                                        | <i>E. coli</i>       | TEM-1, CMY-2                                     | <b>0.11 ± 0.01</b> |                | <b>0.28 ± 0.01</b>         |                | <b>1.02 ± 0.11</b> |                              |
| RUBLA1358                                        | <i>E. coli</i>       | CMY-2                                            | <b>0.20 ± 0.01</b> |                | <b>0.40 ± 0.01</b>         |                | <b>1.32 ± 0.06</b> |                              |
| PEP121                                           | <i>K. pneumoniae</i> | SHV-1, DHA-1, OXA-1                              | 0.05 ± 0.00        |                | 0.06 ± 0.00                |                | 0.09 ± 0.00        |                              |
| PEP194                                           | <i>K. pneumoniae</i> | TEM-1/52, SHV-1, OXA-4, CMY-10                   | 0.05 ± 0.00        |                | 0.06 ± 0.01                |                | 0.08 ± 0.00        |                              |
| PEP041                                           | <i>K. pneumoniae</i> | TEM-1/10, SHV-11, ACT-1, OXA-2                   | 0.05 ± 0.00        |                | 0.06 ± 0.00                |                | 0.07 ± 0.00        |                              |
| PEP007                                           | <i>E. coli</i>       | TEM-1, DHA-7, SHV-12                             | 0.04 ± 0.00        |                | 0.05 ± 0.00                |                | 0.07 ± 0.01        |                              |
| Col20140070                                      | <i>K. pneumoniae</i> | TEM-1, CTX-M-15, SHV-1, OXA-1, OXA-1-like, DHA-2 | 0.04 ± 0.00        |                | 0.05 ± 0.00                |                | 0.08 ± 0.00        |                              |
| RUBLA0127                                        | <i>E. coli</i>       | TEM-1, DHA                                       | 0.05 ± 0.00        |                | 0.05 ± 0.00                |                | 0.09 ± 0.00        |                              |
| RUBLA0045                                        | <i>E. coli</i>       | MutAmpC, OXA-1                                   | 0.08 ± 0.01        |                | 0.05 ± 0.00                |                | 0.07 ± 0.00        |                              |
| RUBLA0315                                        | <i>E. coli</i>       | MutAmpC                                          | 0.06 ± 0.01        |                | 0.05 ± 0.00                |                | 0.07 ± 0.00        |                              |
| RUBLA1048                                        | <i>E. coli</i>       | MutAmpC                                          | 0.08 ± 0.01        |                | 0.05 ± 0.00                |                | 0.08 ± 0.00        |                              |
| PEP032                                           | <i>M. organii</i>    | TEM-1, CTX-M-15, NDM-1, DHA-1, OXA-1             | 0.04 ± 0.00        |                | 0.07 ± 0.01                |                | 0.08 ± 0.00        |                              |
| PEP033                                           | <i>E. cloacae</i>    | TEM-1, SHV-12, CTX-M-15, NDM-1, MIR, OXA-1       | 0.05 ± 0.00        |                | 0.08 ± 0.00                |                | 0.09 ± 0.00        |                              |
| PEP122                                           | <i>M. organii</i>    | TEM-1, CTX-M-15, NDM-1, DHA-1, OXA-1             | 0.06 ± 0.00        |                | 0.07 ± 0.00                |                | 0.09 ± 0.00        |                              |
| PEP042                                           | <i>E. coli</i>       | TEM-1, CTX-M-9, CMY-10, OXA-4, OXA-224           | 0.06 ± 0.01        |                | 0.07 ± 0.01                |                | 0.08 ± 0.00        |                              |
| PEP176                                           | <i>A. Baumannii</i>  | NDM-1                                            | 0.05 ± 0.00        |                | 0.06 ± 0.00                |                | 0.08 ± 0.00        |                              |
| PEP239                                           | <i>K. pneumoniae</i> | SHV-28, NDM-1, OXA-1                             | 0.04 ± 0.00        |                | 0.07 ± 0.00                |                | 0.07 ± 0.00        |                              |
| PEP177                                           | <i>K. pneumoniae</i> | SHV-28, CTX-M-15, NDM-1, OXA-30                  | 0.05 ± 0.00        |                | 0.08 ± 0.00                |                | 0.08 ± 0.01        |                              |
| Col20140047                                      | <i>E. coli</i>       | TEM-52                                           | 0.05 ± 0.00        |                | 0.05 ± 0.00                |                | 0.08 ± 0.00        |                              |
| Col20140090                                      | <i>E. coli</i>       | TEM-1, CTX-M-15, OXA-1, OXA-1-like               | 0.05 ± 0.00        |                | 0.06 ± 0.00                |                | 0.09 ± 0.00        |                              |
| Abs <sup>450</sup> positive cut-off <sup>d</sup> |                      |                                                  | 0.08               |                | 0.08                       |                | 0.09               |                              |

<sup>a</sup>RUBLA isolates (20) belong to ARSIA (Association Régionale de Santé et d'Identification Animale), Ciney, Belgium. Col, PEP and CNR isolates belong to the National Reference Center for Antimicrobial Resistance in Gram -, CHU UCL Namur (Mont-Godinne), Belgium. <sup>b</sup>Gene content of RUBLA isolates was determined by Whole Genome Sequencing (WGS) while gene content of Col, PEP and CNR isolates was determined by PCR and amplified fragment sequencing. <sup>c</sup>MutAmpC: chromosomal overexpressed AmpC presenting three mutations in the promotor at positions -1, -18 and -42. <sup>d</sup>The

Abs<sup>450</sup> positive cut-off values were calculated as an average Abs<sup>450</sup> value of the strain *E. coli* DH5 $\alpha$  presenting no bla genes plus three times the standard deviation.

Cawez et al

**Table 3.** Data collection and refinement statistics.

| <b>Crystal</b>                                              | cAb <sub>CMY-2</sub> (254)/CMY-2 |
|-------------------------------------------------------------|----------------------------------|
| PDB code                                                    | 7PA5                             |
| <b>Data collection</b>                                      |                                  |
| Space group                                                 | P 6 <sub>2</sub> 22              |
| Cell constants                                              |                                  |
| a, b, c [Å]                                                 | 95.12, 95.12, 242.94             |
| α, β, γ [°]                                                 | 90.00, 90.00, 120.00             |
| Resolution range [Å] <sup>a</sup>                           | 48.88 – 3.18 (3.37-3.18)         |
| Rmerge [%] <sup>a</sup>                                     | 71 (342)                         |
| $\langle I \rangle / \langle \sigma I \rangle$ <sup>a</sup> | 7.1 (1.28)                       |
| Completeness [%] <sup>a</sup>                               | 99.6 (97.9)                      |
| Redundancy <sup>a</sup>                                     | 37.8 (34.8)                      |
| CC (1/2) <sup>a</sup>                                       | 0.999 (42.9)                     |
| <b>Refinement</b>                                           |                                  |
| No. of unique reflections                                   | 11518                            |
| R work [%]                                                  | 0.2067                           |
| R free [%]                                                  | 0.2502                           |
| No. atoms                                                   | 7475                             |
| Protein                                                     | 7467                             |
| Solvent                                                     | 8                                |
| RMS deviations from                                         |                                  |
| Bond lengths [Å]                                            | 0.004                            |
| Bond angles [°]                                             | 1.03                             |
| Mean B factor [Å <sup>2</sup> ]                             | 78.0                             |
| Ramachandran plot:                                          |                                  |
| Favored region [%]                                          | 96                               |
| Allowed regions [%]                                         | 4                                |

<sup>a</sup>Values in parentheses are related to high resolution shell.
